1 **Title:**

2 **GABA neurons in the ventral tegmental area regulate non-rapid eye movement**  
3 **sleep in mice**

4

5 **Authors:**

6 Srikanta Chowdhury<sup>1,2,3</sup>, Takanori Matsubara<sup>1,2,3</sup>, Toh Miyazaki<sup>1,2,3</sup>, Daisuke Ono<sup>1,2,3</sup>,  
7 Manabu Abe<sup>4</sup>, Kenji Sakimura<sup>4</sup> and Akihiro Yamanaka<sup>1,2,3\*</sup>

8

9 **Affiliations:**

10 <sup>1</sup>Department of Neuroscience II, Research Institute of Environmental Medicine, Nagoya  
11 University, Nagoya 464-8601, Japan

12 <sup>2</sup>Department of Neural Regulation, Nagoya University Graduate School of Medicine,  
13 Nagoya 466-8550, Japan

14 <sup>3</sup>CREST, JST, Honcho Kawaguchi, Saitama 332-0012, Japan

15 <sup>4</sup>Brain Research Institute, Niigata University, Niigata 950-2181, Japan

16

17 \* Correspondence should be addressed to:

18 Akihiro Yamanaka Ph.D.

19 e-mail: [yamank@riem.nagoya-u.ac.jp](mailto:yamank@riem.nagoya-u.ac.jp)

20 Tel: +81-52-789-3861

21 Fax: +81-52-789-3889

1 **Abstract**

2 The daily sleep/wakefulness cycle is regulated by coordinated interactions between  
3 sleep- and wakefulness-regulating neural circuitry. However, the detailed neural circuitry  
4 mediating sleep is far from understood. Here, we found that glutamic acid  
5 decarboxylase 67 (Gad67)-positive GABAergic neurons in the ventral tegmental area  
6 ( $VTA_{Gad67+}$ ) are a key regulator of non-rapid eye movement (NREM) sleep in mice.  
7  $VTA_{Gad67+}$  neurons project to multiple brain areas implicated in sleep/wakefulness  
8 regulation such as the lateral hypothalamus (LH) and dorsal raphe nucleus.  
9 Chemogenetic activation of  $VTA_{Gad67+}$  neurons promoted NREM sleep with higher delta  
10 power whereas optogenetic inhibition of these neurons induced prompt arousal from  
11 NREM sleep under highly somnolescent conditions, but not during REM sleep. *In vivo*  
12 fiber photometry recordings revealed that  $VTA_{Gad67+}$  neurons showed the highest  
13 population activity in NREM sleep and the lowest activity in REM sleep. Acute brain  
14 slice electrophysiology combined with optogenetics revealed that  $VTA_{Gad67+}$  neurons  
15 directly innervate and inhibit wake-promoting orexin/hypocretin neurons in the LH by  
16 releasing GABA. Taken together, we reveal that  $VTA_{Gad67+}$  neurons play a crucial role in  
17 the regulation of NREM sleep.

18

19 **Keywords:** VTA, NREM sleep, Gad67, chemogenetics, optogenetics, fiber photometry

## 1 **Introduction**

2 Sleep or sleep-like behavioral quiescence is known to be one of the most  
3 ubiquitously observed phenomena across the animal kingdom, from nematodes to  
4 primates (Joiner, 2016; Siegel, 2008). Broadly, sleep consists of non-rapid eye  
5 movement (NREM) sleep and REM sleep in mammals (Siegel, 2008). While the  
6 physiological functions of either NREM sleep or REM sleep, or sleep as a whole, are  
7 intriguing and shrouded in mystery, sleep deprivation in humans and experimental  
8 animals causes severe cognitive impairment (Siegel, 2008). Pioneering studies  
9 discovered certain physiological functions of sleep that include clearing metabolic waste  
10 products and toxins from the brain (Xie et al., 2013), memory encoding, consolidation  
11 and erasure (Rasch and Born, 2013), synaptic homeostasis (Bushey et al., 2011), and  
12 energy conservation (Schmidt, 2014). However, a universal function of sleep that is  
13 relevant to all animals is yet to be revealed (Joiner, 2016). As animals remain largely  
14 isolated from sensory processing and goal-oriented activity during sleep, it is expected  
15 that the regulation of sleep, both NREM and REM, as well as arousal should be  
16 controlled by the central nervous system. Many brain areas and residing cellular  
17 subtypes have been shown to be critical in regulating sleep-wakefulness. For instance,  
18 orexin/hypocretin-producing neurons (orexin neurons) in the lateral hypothalamus (LH)  
19 project to and activate monoaminergic, cholinergic, and other peptidergic neurons as  
20 well as other orexin neurons to induce and maintain wakefulness (Brown et al., 2012;  
21 Inutsuka and Yamanaka, 2013; Sakurai, 2007; Scammell et al., 2017). Subsequently,  
22 these monoamine neurons inhibit sleep-active  $\gamma$ -aminobutyric acid (GABA)-ergic  
23 neurons in the ventrolateral preoptic area (VLPO) in the hypothalamus to induce  
24 wakefulness (Saito et al., 2018; Saper et al., 2010). It is reported that some wake-active  
25 neurons also display activity during REM sleep (Brown et al., 2012; Scammell et al.,  
26 2017). Comparatively, NREM sleep is regulated by neurons that release classical fast  
27 neurotransmitters, including GABA. For example, circadian rhythms and/or homeostatic  
28 sleep pressures activate GABAergic neurons in the VLPO and median preoptic nucleus  
29 (MnPO), which in turn inhibit wake-promoting orexin/hypocretin, monoaminergic, and  
30 cholinergic systems (Scammell et al., 2017). While this flip-flop switch model of  
31 sleep-wake regulation is well established, recent studies have demonstrated a critical  
32 involvement of other brain areas and neuronal subtypes in regulating the

1 transformations and subsequent maintenance of specific vigilances states (Liu et al.,  
2 2017; Oishi et al., 2017b).

3 Reinforcement learning, motivation, and locomotion, as well as the adaptation  
4 of responses to salient stimuli, all of which demand behavioral arousal, are critically  
5 regulated by a midbrain structure called the ventral tegmental area (VTA) in both  
6 rodents and primates (Arsenault et al., 2014; Fields et al., 2007). While one could also  
7 expect a critical role for VTA in the regulation of sleep/wakefulness, it is only recently  
8 that VTA dopamine (DA) neurons have been reported to have a fundamental role in the  
9 maintenance of the awake state as well as in the consolidation of arousal in mice  
10 (Eban-Rothschild et al., 2016; Oishi et al., 2017a). However, the VTA contains  
11 considerable heterogeneity among the neuronal subtypes, which include GABAergic  
12 and glutamatergic neurons alongside DA neurons. Studies have reported that about 60–  
13 65% of VTA neurons are dopaminergic, whereas 30-35% are GABAergic, and 2-3% are  
14 glutamatergic neurons (Nair-Roberts et al., 2008; Pignatelli and Bonci, 2015).

15 As GABAergic neurons provide strong inhibition to the wake- and REM-active  
16 DA neurons in the VTA (Eban-Rothschild et al., 2016; Tan et al., 2012; van Zessen et al.,  
17 2012), it is probable that these GABAergic neurons in the VTA may also participate in  
18 sleep/wakefulness regulation. Moreover, GABA-mediated responses have been  
19 implicated in the modulation of the sleep/wakefulness cycle (Brown et al., 2012;  
20 Scammell et al., 2017). However, no study has been conducted to date to confirm the  
21 roles of GABAergic neurons in the VTA in the regulation of sleep/wakefulness.  
22 Therefore, we examined the role of glutamic acid decarboxylase 67 (Gad67)-positive  
23 neurons in the VTA on sleep/wakefulness by using AAV-aided whole-brain anterograde  
24 tracing, neural manipulations by chemo- and optogenetics, fiber photometry, as well as  
25 slice electrophysiology. Gad67 is an isomer of an enzyme that synthesizes GABA from  
26 glutamic acid, suggesting that Gad67+ neurons are GABAergic neurons (Erlander et al.,  
27 1991). We revealed that Gad67+ neurons in the VTA ( $VTA_{Gad67+}$ ) are highly active during  
28 NREM sleep and send their axons to multiple brain areas that were previously reported  
29 to regulate sleep/wakefulness. Bidirectional manipulations of neuronal activity and fiber  
30 photometry recordings of  $VTA_{Gad67+}$  neurons revealed that these neurons are active in  
31 NREM sleep and promote NREM sleep. Part of the NREM sleep-promoting effect of  
32  $VTA_{Gad67+}$  neurons might be mediated through inhibition of wake-promoting  
33 orexin/hypocretin neurons.

## 1 **Results**

### 2 **GABAergic neurons in the VTA project to brain areas involved in the regulation** 3 **of sleep/wakefulness**

4 Glutamatergic, GABAergic, and dopaminergic (DA) neurons are intermingled in the VTA.  
5 Here, we focused on the GABAergic neurons and tried to identify relevant projection  
6 areas. To specifically target GABAergic neurons in the VTA ( $VTA_{GABA}$ ), *Gad67-Cre* mice  
7 (Higo et al., 2009) were unilaterally injected with a Cre-inducible AAV virus carrying  
8 humanized renilla green fluorescent protein (hrGFP) (Figure 1a). Many hrGFP-positive  
9 neurons were observed in the VTA (Figure 1b-d). These hrGFP-positive neurons were  
10 *Gad67*-positive but tyrosine hydroxylase-negative (TH, an enzyme and marker of DA  
11 neurons in the VTA) (Figure 1b,  $n = 4$  mice) confirming that these hrGFP-positive  
12 neurons were GABAergic. Within the VTA, we counted a total of  $636 \pm 122$  neurons per  
13 animal ( $n = 4$  mice). Among them,  $63.5 \pm 1.8\%$  were TH-positive neurons (DA neurons)  
14 and  $36.1 \pm 1.8\%$  were hrGFP-positive neurons. Only  $0.4 \pm 0.1\%$  were co-labeled with  
15 hrGFP and TH (Figure 1c). hrGFP was distributed not only in the soma, but also in the  
16 axons. We could even anterogradely trace axons to reveal projection sites since hrGFP  
17 emits a strong fluorescence (Figure 1d-f). Along with local innervations, we found  
18 long-range projections of *Gad67+* neurons in the VTA ( $VTA_{Gad67+}$ ) throughout the brain.  
19 Among these sites, the lateral hypothalamus (LH) and the central nucleus of the  
20 amygdala (CeA) were densely innervated (Figure 1e-f). Moderate projections were  
21 found in the nucleus accumbens (NAc), ventral pallidum (VP), parafascicular thalamic  
22 nucleus (PF), periaqueductal grey (PAG), ventral nucleus of the lateral lemniscus (VLL),  
23 dorsal raphe nucleus (DR), and pontine reticular nucleus (PnO). These brain areas are  
24 also reported to be involved in the modulation of the sleep/wakefulness, suggesting that  
25  $VTA_{Gad67+}$  neurons might play a role in this regulation (Brown et al., 2012).

26

### 27 **Chemogenetic activation of $VTA_{Gad67+}$ neurons induced NREM sleep with high** 28 **delta power**

29 Next, to reveal whether  $VTA_{Gad67+}$  neurons contribute to the regulation of  
30 sleep/wakefulness, we activated these neurons by means of pharmacogenetics  
31 (chemogenetics), using designer receptors exclusively activated by designer drugs  
32 (DREADD). We bilaterally injected a Cre-inducible AAV virus to express either  
33 hM3Dq-mCherry or mCherry into the VTA of *Gad67-Cre* mice (Figure 2a-b,

1 Supplemental Figure 1a-b). We then confirmed the function of hM3Dq by applying its  
2 ligand clozapine-N-oxide (CNO) to acute brain slices while recording neuronal activity  
3 (Supplemental Figure 1c). As expected, CNO application significantly increased the  
4 firing frequency of hM3Dq-expressing, but not mCherry-expressing,  $VTA_{Gad67+}$  neurons  
5 (Supplemental Figure 1d-e, hM3Dq:  $286 \pm 61\%$ ,  $n = 8$  cells; mCherry:  $110 \pm 8\%$ ,  $n = 6$   
6 cells,  $p = 0.02$ , unpaired  $t$ -test). Next, to analyze the effect of CNO-induced activation of  
7  $VTA_{Gad67+}$  neurons in sleep/wakefulness states, electroencephalogram (EEG) and  
8 electromyogram (EMG) electrodes were implanted in *Gad67-Cre* mice (Figure 2a). After  
9 recovery from the surgery and behavioral habituation (see methods), either saline or  
10 CNO (1 mg/kg) were administered intraperitoneally (i.p.) just before the onset of the  
11 dark period (at 8 pm). CNO administration resulted in a significantly reduced time spent  
12 in wakefulness and increased time spent in NREM sleep (also known as slow-wave  
13 sleep) in the hM3Dq-mCherry expressing mice, but not in mCherry-expressing mice  
14 (Figure 2c-d, hM3Dq:  $n = 6$  mice, mCherry:  $n = 4$  mice). The CNO-induced increase in  
15 NREM sleep lasted for at least 4 hours after CNO administration (Figure 2d, % change  
16 from saline in hM3Dq-mCherry-expressing mice: wakefulness  $22 \pm 2$ , NREM  $259 \pm 18$ ,  
17 REM  $30 \pm 8$ , vs saline NREM,  $p = 3.0e-4$ , paired  $t$ -test). Interestingly, the delta power  
18 (1-5 Hz) during NREM sleep was significantly increased in the CNO-injected group  
19 compared to the NREM sleep in the saline-injected control group (mean relative delta  
20 power for 4 hr post-injection: hM3Dq-saline:  $83 \pm 3\%$ , hM3Dq-CNO:  $138 \pm 8\%$ ,  $p =$   
21  $0.001$ , paired  $t$ -test), suggesting that  $VTA_{Gad67+}$  neurons might be a critical regulator of  
22 slow wave in NREM sleep (Figure 2e-g). However, time spent in REM sleep remained  
23 unaffected during activation of  $VTA_{Gad67+}$  neurons, suggesting that  $VTA_{Gad67+}$  neurons  
24 are involved in the regulation of NREM sleep, but not REM sleep (Figure 2c-d).

25

### 26 **Optogenetic inhibition of $VTA_{Gad67+}$ neurons induced wakefulness**

27 Since activation of  $VTA_{Gad67+}$  neurons resulted in increases in NREM sleep with  
28 increases in delta wave power, we next examined the selective inhibition of  $VTA_{Gad67+}$   
29 neurons, which might be expected to increase wakefulness. To test this, we used an  
30 acute inhibition strategy with optogenetics. An inhibitory anion channel,  
31 channelrhodopsin 2 (ACR2), was expressed in  $VTA_{Gad67+}$  neurons (Figure 3a and  
32 Supplementary Figure 2a-b) (Mohammad et al., 2017). We first confirmed the function  
33 of ACR2 employing *in vitro* electrophysiology. Three weeks after injection of AAV

1 (expressing either ACR2-2A-mCherry or mCherry) into the VTA of *Gad67-Cre* mice, we  
2 prepared acute brain slices including the VTA and performed cell-attached recordings  
3 from mCherry-expressing neurons. Blue light (6.8 mW/mm<sup>2</sup>) was able to completely  
4 silence the spontaneous activity of ACR2-2A-mCherry-expressing VTA<sub>Gad67+</sub> neurons (n  
5 = 10 cells), whereas light irradiation on mCherry alone-expressing neurons had no such  
6 effect (n = 7 cells) (Supplementary Figure 2d-f). Next, using these two groups of mice,  
7 we implanted fiber optics at a diameter of 400 μm into the VTA along with EEG and  
8 EMG recordings (Figure 3a and 3b). After recovery and habituation, continuous blue  
9 light for 5 sec was illuminated every 15 min for 24 hr (Figure 3c). Interestingly, blue light  
10 illumination immediately induced wakefulness from NREM sleep, but not from REM  
11 sleep, in mice expressing ACR2-2A-mCherry (n = 6 mice, Figure 3d-f). No such effect  
12 was observed in mice expressing mCherry alone (n = 5 mice). However, as the  
13 light-induced influences on NREM sleep and wakefulness showed an extended effect  
14 after the cessation of light (Figure 3d-e), with behaviors taking around 60 sec to return  
15 to the basal state, we sought to identify whether optogenetic inhibition of VTA<sub>Gad67+</sub>  
16 neurons also causes prolonged wakefulness. We, therefore, isolated the trials  
17 depending on sleep-wakefulness states just before light illumination in the cases of  
18 wakefulness, NREM, or REM sleep (with the same state lasting ≥30 sec before light  
19 illumination). Surprisingly, we found that optogenetic inhibition of VTA<sub>Gad67+</sub> neurons in  
20 the state of wakefulness prolonged the time spent in wakefulness in all sorted trials  
21 compared to behavior of the control group (Figure 3f, ACR2: 35 ± 5 s, mCherry: 8 ± 8 s;  
22 *p* = 0.02, unpaired *t*-test). Again, REM sleep was not affected. Therefore, these data  
23 showed that *in vivo* optogenetic inhibition of VTA<sub>Gad67+</sub> neurons promoted and sustained  
24 wakefulness in mice. This result clearly suggested that VTA<sub>Gad67+</sub> neurons have a role in  
25 the regulation of not only NREM sleep but also wakefulness.

26 Next, we tested whether brief (5 sec) optogenetic inhibition of VTA<sub>Gad67+</sub>  
27 neurons can induce arousal even under conditions of high homeostatic sleep pressure.  
28 To test this, mice were sleep deprived for 4 hr, starting at light onset, and were then  
29 allowed to experience recovery sleep for 30 min (Figure 4a). Sleep-deprived animals  
30 usually display extended NREM sleep because of high homeostatic sleep pressure.  
31 Moreover, the slow-wave activity in NREM sleep increases during recovery sleep  
32 (Lancel et al., 1992). However, to our surprise, even under such a higher sleep pressure  
33 condition, optogenetic inhibition of VTA<sub>Gad67+</sub> neurons could successfully and

1 immediately induce wakefulness in all trials (Figure 4b and 4c). Once again,  
2 induced-wakefulness displayed an extended effect after cessation of light, whereby it  
3 took  $54 \pm 14$  sec to return to NREM sleep. Taken together, these results suggest that  
4  $VTA_{Gad67+}$  neurons might be involved in the initiation and maintenance of physiological  
5 NREM sleep.

### 6 7 **$VTA_{Gad67+}$ neurons showed the highest population activity during NREM sleep**

8 Our chemogenetic activation and optogenetic inhibition studies suggest that the *in vivo*  
9 activity of  $VTA_{Gad67+}$  neurons might change across brain states with putatively higher  
10 activity during NREM sleep. To test this hypothesis, we recorded the population activity  
11 of  $VTA_{Gad67+}$  neurons using fiber photometry (Inutsuka et al., 2016). A Cre-inducible AAV  
12 expressing the fluorescent calcium indicator GCaMP6f (Chen et al., 2013) was  
13 unilaterally injected into the VTA of *Gad67-Cre* mice ( $n = 8$  mice; Figure 5a and  
14 Supplemental Figure 3a). First, we tested whether GCaMP6f signal from  $VTA_{Gad67+}$   
15 neurons correspond to firing frequency *in vitro* (Supplemental Figure 3b). The  
16 fluorescence intensity from GCaMP6f was increased in an evoked firing  
17 frequency-dependent manner ( $n = 13$ ; Supplemental Figure 3c-e,  $\Delta F/F$  (%), normalized  
18 to 100 Hz), 10 Hz:  $9.2 \pm 3.0$ , 20 Hz:  $23.0 \pm 5.4$ , 50 Hz:  $52.1 \pm 6.2$ ). Next, activity  
19 recordings were performed *in vivo* by a fiber optic inserted into the VTA area  
20 (Supplemental Figure 4b). Offline determination of vigilance states was aided by signals  
21 from EEG-EMG electrodes (Figure 5a-b). Both fluorescence and EEG-EMG were  
22 recorded during the light period in the home cage after habituation. We observed robust  
23 changes in the fluorescence signal across brain states (Figure 5c, Supplemental Figure  
24 3f). To facilitate the statistical analyses of mean  $\Delta F/F$  among vigilance states, we  
25 compared the fluorescence signal at the transition of vigilance states. We found that  
26  $VTA_{Gad67+}$  neurons show the highest population activity during NREM and the lowest  
27 during REM sleep (Figure 5d, Supplemental Figure 3f). Notably,  $VTA_{Gad67+}$  neurons  
28 began to increase their activity before wake-to-NREM transitions (mean  $\Delta F/F$ : Wake:  
29  $2.9 \pm 0.4\%$ , NREM:  $3.8 \pm 0.4\%$ ,  $p = 2.5e-6$ ) and decrease their activity before  
30 NREM-to-REM (mean  $\Delta F/F$ : NREM:  $5.0 \pm 0.5\%$ , REM:  $2.7 \pm 0.3\%$ ,  $p = 2.4e-5$ ) and  
31 NREM-to-wake (mean  $\Delta F/F$ : NREM:  $3.8 \pm 0.5\%$ , wake:  $3.0 \pm 0.4\%$ ,  $p = 2.4e-4$ )  
32 transitions. However, the changes in signal from REM-to-wake (mean  $\Delta F/F$ : REM:  $2.9 \pm$   
33  $0.4\%$ , wake:  $3.7 \pm 0.5\%$ ,  $p = 0.02$ ) was comparatively less significant and occurred only



1 after the onset of state transition. Most interestingly, the population activity of  $VTA_{Gad67+}$   
2 neurons was found to be completely contrary to DA neuronal activity in the VTA (Dahan  
3 et al., 2007; Eban-Rothschild et al., 2016), further suggesting that  $Gad67+$  neurons and  
4 DA neurons differentially modulate sleep-wakefulness in mice (Eban-Rothschild et al.,  
5 2016).

### 6 7 **$VTA_{Gad67+}$ neurons directly inhibited wake-promoting orexin neurons in the lateral** 8 **hypothalamus**

9 Dense projections were observed from  $VTA_{Gad67+}$  neurons to a well-known sleep-wake  
10 regulatory brain region, the lateral hypothalamus (LH), where wake-active and  
11 wake-promoting orexin ( $LH_{orexin}$ ) neurons are exclusively located. Thus, we wondered  
12 whether  $VTA_{Gad67+}$  neurons mediate their sleep-promoting effect through the inhibition of  
13  $LH_{orexin}$  neurons. To test this, we generated a bigenic *orexin-Flippase (Flp); Gad67-Cre*  
14 mouse, in which orexin neurons exclusively express Flp recombinase and  $Gad67+$   
15 neurons express Cre recombinase (Figure 6a-c) (Chowdhury et al., *Manuscript*  
16 *submitted*). We injected a Cre-inducible AAV expressing the blue light-gated cation  
17 channel channelrhodopsin2 (E123T/T159C; ChR2) (Berndt et al., 2011) in the VTA as  
18 well as a Flp-inducible AAV expressing tdTomato in the LH of *orexin-Flp; Gad67-Cre*  
19 mice (Figure 6 a-c). In slice recordings from  $VTA_{Gad67+}$  neurons expressing ChR2, blue  
20 light flashes ( $6.8 \text{ mW/mm}^2$ ) through an objective lens could depolarize and significantly  
21 increase spontaneous firing frequency to approximately 650% compared with before  
22 light illumination (Figure 6d-f,  $n = 5$  cells,  $p = 0.004$  vs either pre or post, one-way  
23 ANOVA followed by post-hoc Tukey). Next, we recorded spontaneous firings from  
24 tdTomato-positive neurons (orexin neurons) in the LH by loose cell-attached recordings  
25 and the nerve terminals of  $VTA_{Gad67+}$  neurons in the LH were activated by illuminating  
26 blue light pulses (Figure 6g and supplementary Figure 5a). We found that blue light  
27 inhibited  $LH_{orexin}$  neuron firing in a light-pulse frequency-dependent manner (5, 10 and  
28 20 Hz). However, no such effect was observed when yellow light pulses (20 Hz) were  
29 applied (Berndt et al., 2011) (Figure 6h and Supplementary Figure 5b-c).

30 To reveal the mechanism of inhibition of orexin neurons, we performed  
31 additional electrophysiological experiments. We performed whole-cell voltage clamp  
32 recordings from orexin neurons at  $-60 \text{ mV}$  holding potential ( $mV_{hold}$ ) to record  
33 post-synaptic currents. Activation of nerve terminals of  $VTA_{Gad67+}$  neurons in the LH

1 (blue light pulse, duration of 5 ms) induced a post-synaptic current (PSC) in 8 out of 11  
2 cells. These light-induced PSCs were blocked by gabazine (10  $\mu$ M), a GABA<sub>A</sub> receptor  
3 antagonist (Figure 7a-c, aCSF:  $-253 \pm 70$  pA, gabazine:  $-9 \pm 3$  pA,  $n = 8$ ,  $p = 1.6e-10$ ,  
4 paired *t*-test). This result suggests that GABA is involved in generating the light-induced  
5 PSCs in LH<sub>orexin</sub> neurons. The average synaptic delay from light onset was recorded as  
6  $6.2 \pm 1.0$  ms (Figure 7d). To rule out the effect of glutamate, we blocked both AMPA  
7 ( $\alpha$ -amino-3-hydroxy-5-methyl-4-isoxazolepropionic acid) and NMDA  
8 (N-Methyl-D-aspartic acid) type glutamate receptors by applying CNQX (20  $\mu$ M) and  
9 AP5 (50  $\mu$ M), respectively, in the extracellular bath solution. CNQX and AP5 could not  
10 block light-induced PSCs, while the combination of CNQX, AP5, and gabazine could  
11 inhibit (Figure 7e-g. AP5+CNQX:  $-188 \pm 38$  pA, with gabazine:  $-6 \pm 2$  pA,  $n = 7$ ,  $p =$   
12  $3.1e-9$ ). Again, a delay of  $6.7 \pm 0.3$  ms was found (Figure 7h). Finally, to confirm whether  
13 light-induced PSCs were indeed driven by monosynaptic release of GABA from  
14 VTA<sub>Gad67+</sub> neurons, we performed an additional set of experiments (Figure 7i-l). We  
15 found that tetrodotoxin (TTX, 1  $\mu$ M), a blocker of voltage-gated sodium channels,  
16 inhibited the light-induced PSCs (Figure 7i-k. aCSF:  $-340 \pm 73$  pA, TTX:  $-2 \pm 0.6$  pA,  $n =$   
17  $6$ ). However, combined application of TTX along with 4-AP (4-aminopyridine, 1 mM), a  
18 voltage-gated potassium (Kv) channel blocker, could rescue the light-induced PSCs,  
19 suggesting a monosynaptic connection between VTA<sub>Gad67+</sub> neurons and LH<sub>orexin</sub> neurons  
20 ( $-291 \pm 131$  pA). Again, the rescued current was blocked by adding gabazine ( $-6 \pm 2$  pA),  
21 but not by CNQX ( $-295 \pm 121$  pA). Finally, to further confirm that Cl<sup>-</sup> channels are  
22 involved in this GABAergic input, we changed  $mV_{hold}$  to +90 mV. The calculated the  
23 reversal potential of Cl<sup>-</sup> under recording conditions were near 0 mV (2.2 mV). As  
24 expected, we found that the current direction of light-induced PSCs was opposite at +90  
25  $mV_{hold}$  (Figure 7j-k,  $237 \pm 115$  pA). All these experiments confirm that LH<sub>orexin</sub> neurons  
26 were directly innervated and inhibited by VTA<sub>Gad67+</sub> neurons.

## 1 **Discussion**

2 By employing anterograde tracing and localization of brain-wide neural  
3 projections, bidirectional neuronal manipulations, fiber photometry, slice  
4 electrophysiology, as well as sleep recordings, we provide multiple lines of evidence in  
5 favor of our claim that VTA<sub>Gad67+</sub> neurons regulate NREM sleep in mice. GABAergic  
6 neurons constitute a significant part of the VTA (Nair-Roberts et al., 2008; Pignatelli and  
7 Bonci, 2015) and help to regulate the function of DA neurons residing nearby (Tan et al.,  
8 2012; van Zessen et al., 2012). Dysregulation of signaling pathways in the VTA is  
9 associated with drug abuse and several other psychiatric disorders including  
10 schizophrenia, bipolar disorder, and major depressive disorder (Winton-Brown et al.,  
11 2014; Wulff et al., 2010). Moreover, irregular sleep-wake timing and architectures are  
12 recognized as common co-morbidities in many neuropsychiatric and neurodegenerative  
13 diseases (Wulff et al., 2010). Therefore, the relationship between neurochemical  
14 signaling in the VTA and the regulation of sleep/wakefulness poses an interesting point  
15 of study. However, classical lesioning experiments suggest that cats with reduced  
16 dopamine levels exhibit decreased behavioral arousal but no significant change in  
17 electro-cortical waking (Jones et al., 1973). It is only very recently that investigators  
18 have shown an interest in understanding the role of the VTA in the regulation of  
19 sleep/wakefulness (Eban-Rothschild et al., 2016; Oishi et al., 2017a; Yang et al., 2018).  
20 However, not much scientific literature has been published focusing on the functional  
21 importance of GABAergic neurons in the VTA. Therefore, our findings on the role of  
22 these neurons in sleep/wakefulness regulation will provide a conceptual and systematic  
23 framework for the association between sleep and psychiatric disorders and will  
24 generate opportunities to study VTA-related dysregulation in mental disorders.

25 van Zassen and colleagues reported that *in vivo* optogenetic activation of  
26 GABAergic neurons in the VTA in mice disrupts reward consummatory behavior  
27 (van Zessen et al., 2012). In addition, Shank *et al.* reported that dose- and time-related  
28 selective ablation of GABAergic neurons in the VTA in rats increased spontaneous  
29 locomotor activity (Shank et al., 2007). These studies are consistent with the hypothesis  
30 that GABAergic neurons in the VTA play an important role in the regulation of behavior.  
31 We now argue that one reason for such disruption in behavior might be promotion of  
32 NREM sleep by selective activation of GABAergic neurons in the VTA.

1           Using bidirectional chemogenetic manipulations as well as neurotoxic lesions  
2 in rats, a recent study found that neurons in the rostromedial tegmental nucleus (RMTg),  
3 also known as the GABAergic tail of the VTA, are essential for physiological NREM  
4 sleep (Yang et al., 2018). Although Yang *et al.* did not identify neuronal subtypes  
5 involved in the RMTg, their results might be related to our findings. Interestingly,  
6  $VTA_{Gad67+}$  neurons in our study are located throughout the VTA, but at a somewhat  
7 higher density toward the caudal parts of the VTA. More recently, Takata *et al.* reported  
8 that GABA neurons in the ventral medial midbrain/pons, which includes the VTA region,  
9 regulate sleep/wake cycles by modulating DA neurons (Takata et al., 2018). These  
10 GABA neurons should include  $VTA_{Gad67+}$  neurons. Indeed, GABAergic neurons  
11 regulating NREM sleep might be distributed across both VTA and RMTg.

12           Chemogenetic activation of  $VTA_{Gad67+}$  neurons induced NREM sleep  
13 accompanied by higher delta power (slow wave) compared with control conditions  
14 (Figure 2g), suggesting that  $VTA_{Gad67+}$  neurons might play a critical role in the generation  
15 of slow wave in NREM sleep. Recently, Oishi *et al.* reported that activation of either the  
16 cell bodies of GABAergic neurons in the core of NAc or their axonal terminals in the VP  
17 enabled evoked slow wave sleep (Oishi et al., 2017b). In addition, activation of  
18 GABAergic neurons in the basal forebrain, which includes the VP, produced  
19 wakefulness, whereas their inhibition induced sleep (Anaclet et al., 2015). These facts  
20 suggest that inhibition of GABAergic neurons in the VP is a critical pathway to generate  
21 slow wave in NREM sleep. We also found that  $VTA_{Gad67+}$  neurons moderately project to  
22 the VP. Therefore, we reasoned that  $VTA_{Gad67+}$  neurons projecting to the VP might be  
23 involved in the generation of slow wave sleep.

24           Population activity recordings across vigilance states shows that DA neurons  
25 in the VTA exhibit higher activity in REM sleep versus either wake or NREM sleep  
26 (Eban-Rothschild et al., 2016). On the contrary,  $VTA_{Gad67+}$  neurons exhibit a completely  
27 opposite activity pattern from that of DA neurons across vigilance states, with highest  
28 activity during NREM sleep (Figure 5). This suggests an existing functional interaction  
29 between DA neurons and  $VTA_{Gad67+}$  neurons. Using *in vivo* single unit recordings in rats,  
30 Lee *et al.* found wake- and REM-active  $VTA_{GABA}$  neurons, suggesting that there might  
31 be several types of  $VTA_{GABA}$  neurons (Lee et al., 2001). Our fiber photometry data  
32 showed that  $VTA_{Gad67+}$  neurons exhibit weak activity even during wakefulness. This  
33 might suggest that  $VTA_{Gad67+}$  neurons are also comprised of several subtypes. However,

1 most VTA<sub>Gad67+</sub> neurons are predominantly active in NREM sleep. Therefore, additional  
2 research is needed to clarify any electrophysiological, anatomical, and/or functional  
3 variations of GABAergic neurons in the VTA. Very recently, Yu et al. reported that  
4 coordinated interaction between GABA and glutamate neurons in the VTA regulate  
5 sleep/wakefulness in mice (Yu et al., 2019). Although this study similarly found the  
6 NREM-sleep promoting role of VTA<sub>GABA</sub> neurons, the *in vivo* activity of VTA<sub>GABA</sub> neurons  
7 are quite contrast from us with the highest activity observed during wake and REM  
8 sleep. Difference was that Yu et al. used *VGAT-Cre* mice and we used *Gad67-Cre* mice  
9 to target GABAergic neurons. Again this difference might suggest the existence of  
10 different type of GABAergic neurons in the VTA.

11 Optogenetic inhibition of VTA<sub>Gad67+</sub> neurons induced immediate wakefulness  
12 from NREM sleep, but not from REM sleep, suggesting the importance of uninterrupted  
13 neuronal activity of VTA<sub>Gad67+</sub> neurons for the maintenance of NREM sleep. Both  
14 chemogenetic activation and optogenetic inhibition data suggest that VTA<sub>Gad67+</sub> neurons  
15 might not play a decisive role in the physiological regulation of REM sleep. Interestingly,  
16 inhibition of VTA<sub>Gad67+</sub> neurons prolonged wakefulness (Figure 3f). This result might  
17 suggest that VTA<sub>Gad67+</sub> neurons also regulate levels of wakefulness. This is consistent  
18 with data showing that VTA<sub>Gad67+</sub> neurons displayed weak activity in wakefulness in  
19 terms of population activity. This idea is also supported by observed increases in  
20 spontaneous locomotor activity following selective ablation of VTA<sub>GABA</sub> neurons in rats  
21 (Shank et al., 2007). These facts might suggest that an improvement in alertness and  
22 ability to maintain wakefulness require the suppression of activity of VTA<sub>GABA</sub> neurons.

23 One possible cellular mechanism underlying NREM sleep promotion by  
24 VTA<sub>GABA</sub> neurons is via inhibition of DA neurons residing in the VTA. In addition to this,  
25 our results showed that direct inhibition of wake-promoting LH<sub>orexin</sub> neurons might  
26 contribute to the induction of NREM sleep. Projection-specific activation of VTA<sub>GABA</sub>  
27 neuron nerve terminals using optogenetics will reveal the most responsible pathways to  
28 induce NREM sleep. It will also be fascinating to study how VTA<sub>GABA</sub> neurons are  
29 regulated. Using an optimized trans-synaptic retrograde tracing approach, Faget and  
30 colleagues recently labeled afferent neurons to DA, GABA, or glutamate neurons in the  
31 VTA and found that these populations receive qualitatively similar inputs, with dominant  
32 and comparable projections from three brain areas known to be critical for  
33 sleep/wakefulness regulation: LH, raphe, and ventral pallidum (Faget et al., 2016). Here

1 we report that  $VTA_{Gad67+}$  neurons project to those areas, suggesting the existence of a  
2 mutual interaction with these brain areas to regulate sleep/wakefulness.

3 In conclusion, our study elucidated that  $VTA_{GABA}$  neurons regulate NREM  
4 sleep in mice. These neurons might be a possible target for therapeutic intervention in  
5 treating sleep-related disorders as well as neuropsychiatric disorders.

1 **Funding:** This work was supported by JST CREST (JPMJCR1656 to A.Y.), KAKENHI  
2 grants (18H02523, 18KK0223, 18H05124 and 16H01271 to A.Y., and 18H02477 to  
3 D.O.) from MEXT Japan, and by SUZUKEN MEMORIAL FOUNDATION to A.Y.

4  
5  
6 **Acknowledgments:** We thank C. J. Hung for supporting the sleep data analysis, S.  
7 Kikuchi for performing the sleep deprivation study and supporting the creation of movies,  
8 G. Wang for analyzing the separation of vigilance state transitions, S. M. Rahman for  
9 assisting cell counting procedures, and S. Tsukamoto and Y. Miyoshi for other technical  
10 assistance.

11  
12  
13 **Author contributions:** S.C. and A.Y. designed the experiments. S.C. performed  
14 optogenetic, fiber photometry, and electrophysiology studies and analyzed the data,  
15 T.Ma. performed AAV injections and the brain-wide anterograde tracing study, T.Mi.  
16 performed the chemogenetic study and analyzed data, D.O. contributed to animal  
17 surgery for the fiber photometry study and supported the optogenetic study and data  
18 analysis, and M.A. and K.S. generated *orexin-flippase* and *Gad67-Cre* mice. A.Y.  
19 supervised the project. S.C. and A.Y. wrote the manuscript with input from the other  
20 co-authors.

21  
22  
23 **Financial disclosure statements:** None

## 1 **Methods**

### 2 *Animals*

3 All experimental protocols that involved animals were approved by the Institutional  
4 Animal Care and Use Committees, Research Institute of Environmental Medicine,  
5 Nagoya University, Japan. All efforts were made to reduce the number of animals used  
6 and also to minimize the suffering and pain of animals. Animals were maintained on a  
7 12-hour light-dark cycle (lights were turned on at 8:00 am), with free access to food and  
8 water.

9

### 10 *Generation and Microinjection of Adeno-Associated Virus (AAV) Vectors*

11 AAV vectors were produced using the AAV Helper-Free System (Agilent Technologies,  
12 Inc., Santa Clara, CA). The virus purification method was adopted from a previously  
13 published protocol (Inutsuka et al., 2016). Briefly, HEK293 cells were transfected  
14 together with three distinct plasmids carrying a pAAV vector, pHelper and pAAV-RC  
15 (serotype 9 or DJ; purchased from Cell Biolabs Inc., San Diego, CA) using a standard  
16 calcium phosphate method. HEK293 cells were collected and suspended in artificial  
17 CSF (aCSF) solution (in mM: 124 NaCl, 3 KCl, 26 NaHCO<sub>3</sub>, 2 CaCl<sub>2</sub>, 1 MgSO<sub>4</sub>, 1.25  
18 KH<sub>2</sub>PO<sub>4</sub> and 10 glucose) three days post-transfection. Following multiple freeze-thaw  
19 cycles, the cell lysates were treated with benzonase nuclease (Merck, Darmstadt,  
20 Germany) at 37°C for 30 min, and were centrifuged 2 times at 16,000 g for 10 min at  
21 4°C. The supernatant was used as the virus-containing solution. Quantitative PCR was  
22 performed to measure the titer of purified virus. Virus aliquots were then stored at -80°C  
23 until use.

24         Adult *Gad67-Cre* or *orexin-Flp*; *Gad67-Cre* mice of both sexes were subjected  
25 to either unilateral or bilateral injection of AAV(9)-CMV-FLEX-hrGFP (100 X1 nl,  
26  $6.0 \times 10^{12}$  copies/ml), AAV(9)-CAG-FLEX-hM3Dq-mCherry (200 X2 nl,  $1.1 \times 10^{12}$   
27 copies/ml), AAV(9)-CMV-FLEX-ACR2-2A-mCherry (300 X2 nl,  $6.2 \times 10^{12}$  copies/ml),  
28 AAV(9)-CAG-FLEX-mCherry (300 X2 nl,  $1.9 \times 10^{12}$  copies/ml), AAV(9)-CMV-FLEX-ChR2  
29 (ET/TC)-eYFP (300 nl,  $3.0 \times 10^{13}$  copies/ml), or AAV(9)-CMV-FLEX-GCaMP6f (300 X1 nl,  
30  $1.3 \times 10^{12}$  copies/ml) into the VTA (3.0 to 3.7 mm posterior and 0.4 to 0.6 mm lateral from  
31 bregma, 4.0 to 4.2 mm deep from brain surface) under ~1.2% isoflurane (Fujifilm Wako  
32 Pure Chemical Industries, Osaka, Japan) anesthesia. *Orexin-Flp*; *Gad67-Cre* bigenic  
33 mice also received bilateral injection of AAV(DJ)-CMV-dFrt-tdTomato-WPRE (300 X2 nl,  
34  $8.1 \times 10^{12}$  copies/ml) into the lateral hypothalamic area (1.5 mm posterior and 0.5 mm  
35 lateral from bregma, 5.0 mm deep from brain surface), which were used for slice  
36 electrophysiological experiments.

37

### 38 *Immunohistochemistry*

39 Under deep anesthesia with 0.65% pentobarbital sodium solution (Kyoritsu Seiyaku  
40 Corporation, Tokyo, Japan) diluted with saline (1.0 ml/kg body weight), mice were  
41 subjected to serial transcardial perfusion first using ice-cold saline (20 ml) and then



1 ice-cold 4% formaldehyde solution (20 ml, Fujifilm Wako Pure Chemical Industries, Ltd.,  
2 Osaka, Japan). The brain was then gently collected and post-fixed with 4%  
3 formaldehyde solution at 4°C overnight. Later, the brain was subsequently immersed in  
4 phosphate-buffered saline (PBS) containing 30% sucrose at 4°C for at least 2 days.  
5 Coronal sections of either 40 or 80 µm thickness were made using a cryostat (Leica  
6 CM3050 S; Leica Microsystems, Wetzlar, Germany; or Leica VT1000 S, Wetzlar,  
7 Germany), and slices were preserved in PBS containing 0.02% of NaN<sub>3</sub> at 4°C until  
8 stained. For staining, coronal brain sections were immersed in blocking buffer (1% BSA  
9 and 0.25% Triton-X in PBS), and then incubated with primary antibodies (TH: Millipore,  
10 Massachusetts, 1/1000 dilution; DAT: Frontier Institute Co. Ltd., Hokkaido, Japan,  
11 1/1000 dilution, Japan; DsRED: Santa Cruz Biotechnology, Heidelberg, Germany,  
12 1/1000 dilution; GFP: Fujifilm Wako Pure Chemical Corporation, Osaka, Japan, 1/1000  
13 dilution; orexin-A: Santa Cruz Biotechnology, 1/1000 dilution) at 4°C overnight. For  
14 Gad67 staining, slices were incubated with anti-Gad67 antibody (Millipore, 1/500  
15 dilution in blocking buffer without Triton-X) at 4°C for 4 days. After washing by blocking  
16 buffer three times, the brain sections were then incubated with secondary antibodies for  
17 1 hr at room temperature. After washing with the same blocking solution three times,  
18 slices were stained by 4',6-diamidino-2-phenylindole dihydrochloride (DAPI: Thermo  
19 Fisher Scientific, Yokohama, Japan) across several experiments. Slices were mounted  
20 in 50% glycerol solution and examined with an epifluorescence microscope (BZ-9000,  
21 Keyence, Osaka, Japan or IX71, Olympus, Tokyo, Japan).

22

### 23 *Anterograde Tracing and Localization of Brain-Wide Neural Projections*

24 A Cre-inducible AAV carrying the hrGFP gene (AAV(9)-CMV-FLEX-hrGFP; 100 X1 nl,  
25  $6.0 \times 10^{12}$  copies/ml) was unilaterally injected into the VTA of *Gad67-Cre* mice. Three  
26 weeks post-injection, animals were perfused-fixed and brain slices of 80 µm thickness  
27 were made serially from the anterior to the posterior part of the brain using a vibratome  
28 (Leica VT1000 S, Wetzlar, Germany). After DAPI staining, slices were serially mounted  
29 and images were taken using an epifluorescence microscope (BZ-9000, Keyence,  
30 Osaka, Japan or IX71, Olympus, Tokyo, Japan). Images were taken using an identical  
31 configuration in the microscope and were then analyzed using ImageJ (US National  
32 Institute of Health) software. Projection scorings were made in all visible projection sites,  
33 except for the VTA, by first selecting the most innervated brain region and comparing  
34 other areas to that region.

35

### 36 *Surgery for EEG-EMG and/or Optogenetics, Fiber Photometry*

37 Procedures for implanting EEG and EMG electrodes for polysomnographic recording  
38 experiments were adapted from the previously published protocol (Tabuchi et al., 2014).  
39 Briefly, virus-injected mice were implanted with EEG and EMG electrodes under  
40 isoflurane anesthesia. Immediately after surgery, each mouse received an i.p. injection  
41 of 10 ml/kg of an analgesic solution containing 0.5 mg/ml of Carprofen (Zoetis Inc.,

1 Parsippany-Troy Hills, NJ). Mice were singly housed for 7 days during the recovery  
2 period. Mice were then connected to a cable in order to allow them to move freely in the  
3 cage as well as to be habituated to the recording cable for another 7 days.

4 For fiber-guided optogenetic experiments, virus-injected mice received a  
5 surgical implantation of single fiber optic cannula (400  $\mu\text{m}$ ; Lucir Inc., Japan), along with  
6 EEG-EMG electrodes, above the VTA (AP -3.3 to -3.6 mm; ML 0.4 to 0.6 mm; DV -3.75  
7 mm. For fiber photometry experiments, virus-injected mice received surgical  
8 implantation of a single guide cannula (400  $\mu\text{m}$ ; Thorlabs Inc.) just above the VTA (AP –  
9 3.3 mm; ML 0.4 to 0.5 mm; DV –4.0 mm) to target VTA<sub>Gad67+</sub> neurons. These mice were  
10 also implanted with the EEG-EMG electrodes following the protocol described above.

### 11 12 *Vigilance State Determination*

13 EEG and EMG signals were amplified (AB-610J, Nihon Koden, Japan), filtered (EEG at  
14 1.5-30 Hz, and EMG at 15-300 Hz), digitized (at a sampling rate of 128 Hz), and  
15 recorded (Vital Recorder, Kissei Comtec Co., Ltd, Japan) from individual habituated  
16 mice. Recorded signals were then analyzed to identify vigilance states using SleepSign  
17 (Kissei Comtec) software. Vigilance state identification was assisted by an infrared  
18 sensor as well as by video monitoring through a CCD video camera (Amaki Electric Co.,  
19 Ltd., Japan) during both the light and dark periods (Kissei Comtec). Video recording  
20 during the dark period was aided by infrared photography (Amaki Electric Co., Ltd.,  
21 Japan). EEG and EMG data were automatically scored in epochs (every 4 sec) and  
22 classified as wake, rapid eye movement sleep, or non-rapid eye movement sleep. All  
23 auto-screened data were examined visually and corrected. The EEG analysis yielded  
24 power spectra profiles over a 0~20 Hz window with 1 Hz resolution for delta (1-5 Hz),  
25 theta (6-10 Hz), alpha (11-15 Hz), and beta (16-20 Hz) bandwidths. The criteria for  
26 determining vigilance states were the same as the protocol described elsewhere  
27 (Tabuchi et al., 2014): briefly, (i) wake (low EEG amplitude with high EMG or locomotion  
28 score), (ii) NREM sleep (low EMG and high EEG delta amplitude), and (iii) REM sleep  
29 (low EMG as well as low EEG amplitude with high theta activity, and should be followed  
30 by NREM).

### 31 32 *In Vivo Recordings and Data Analysis of Neuronal Activity Using Fiber Photometry*

33 *In vivo* population activity of the VTA<sub>Gad67+</sub> neurons was recorded using a silica fiber of  
34 400  $\mu\text{m}$  by implanting the fiber just above the VTA. Details of the fiber photometric  
35 recordings are described elsewhere (Inutsuka et al., 2016). Briefly, the fiber photometry  
36 system (COME2-FTR/OPT, Lucir, Tsukuba, Japan) utilizes a custom-made single silica  
37 fiber of 400  $\mu\text{m}$  diameter to deliver excitation light and to detect fluorescence from  
38 GCaMP6f, simultaneously. Blue excitation light (465 nm, 0.5 mW at the tip of the silica  
39 fiber) was produced by a high-power LED system (PlexonBright OPT/LED Blue\_TT\_FC,  
40 Plexon, Dallas, TX). The LED-emitted excitation light was reflected by a dichroic mirror  
41 and coupled to the silica fiber (400  $\mu\text{m}$  diameter) through an excitation bandpass filter

1 (path  $472 \pm 35$  nm). GCaMP6f-emitted green fluorescence was collected by the same  
2 silica fiber passed through a bandpass emission filter (path  $525 \pm 25$  nm) and guided to  
3 a photomultiplier (PMT-H-S1M1-CR131, Zolix instruments, Beijing, China). The fiber  
4 photometry signal was recorded by Vital Recorder (Kissei Comtec Co., Ltd, Japan)  
5 along with the EEG/EMG signals. Fiber photometry signals were collected at a sampling  
6 frequency of 128 Hz and the software averaged every 10 samples to minimize  
7 fluctuations and noise.

8 After recording and sleep analysis, the fiber photometry signal was outputted  
9 along with the EEG and EMG signals as a text file of raw data. For each experiment, the  
10 photometry signals at all data points were motion averaged and were then converted to  
11  $\Delta F/F$  by  $\Delta F/F(t) = (F(t) - F_{\min})/F_{\min}$ . We recorded the signals in the light period as  
12 nocturnal animal mice usually show multiple transitions among different vigilance states  
13 during the light period. All mice were subjected to at least two recording sessions with at  
14 least a 2-day interval in between each session to allow photobleaching recovery. We  
15 separated all sleep-state transitions that last at least for 1 min before and after the state  
16 change. All the sessions were selected after the photometry signal became stable, as  
17 we observed a decay of photometry signal at the beginning of the recordings.

#### 19 *Acute Brain Slice Preparation*

20 Preparation of acute brain slices and subsequent electrophysiological recordings were  
21 performed as previously reported with a slight modification (Chowdhury and Yamanaka,  
22 2016). Briefly, mice were decapitated under isoflurane (Fujifilm Wako Pure Chemical  
23 Industries) anesthesia and the brain was quickly isolated and chilled in an ice-cold  
24 cutting solution (in mM: 110 K-gluconate, 15 KCl, 0.05 EGTA, 5 HEPES, 26.2 NaHCO<sub>3</sub>,  
25 25 glucose, 3.3 MgCl<sub>2</sub> and 0.0015 ( $\pm$ )-3-(2-carboxypiperazin-4-yl)propyl-1-phosphonic  
26 acid) gassed with 95% O<sub>2</sub> and 5% CO<sub>2</sub>. Coronal slices of 300  $\mu$ m thickness containing  
27 either VTA or LH were prepared using a vibratome (VT-1200S; Leica, Wetzlar,  
28 Germany) and were temporarily placed in an incubation chamber containing a bath  
29 solution (in mM: 124 NaCl, 3 KCl, 2 MgCl<sub>2</sub>, 2 CaCl<sub>2</sub>, 1.23 NaH<sub>2</sub>PO<sub>4</sub>, 26 NaHCO<sub>3</sub> and 25  
30 glucose) gassed with 95% O<sub>2</sub> and 5% CO<sub>2</sub> in a 35°C water bath for 30-60 min. Slices  
31 were then incubated at room temperature in the same incubation chamber for another  
32 30-60 min for recovery.

#### 34 *In Vitro Electrophysiology*

35 After the recovery period, acute brain slices were transferred to a recording chamber  
36 (RC-26G; Warner Instruments, Hamden, CT). The recording chamber was equipped  
37 with an upright fluorescence microscope (BX51WI; Olympus, Tokyo, Japan) stage and  
38 was superfused with a 95% O<sub>2</sub> and 5% CO<sub>2</sub>-gassed bath solution at a rate of 1.5 ml/min  
39 using a peristaltic pump (Dynamax; Rainin, Oakland, CA). An infrared camera  
40 (C3077-78; Hamamatsu Photonics, Hamamatsu, Japan) was installed in the  
41 fluorescence microscope along with an electron multiplying charge-coupled device

1 camera (Evolve 512 delta; Photometrics, Tucson, AZ) and both images were separately  
2 displayed on monitors. Micropipettes of 4-6 M $\Omega$  resistance were prepared from  
3 borosilicate glass capillaries (GC150-10; Harvard Apparatus, Cambridge, MA) using a  
4 horizontal puller (P-1000; Sutter Instrument, Novato, CA). Patch pipettes were filled with  
5 KCl-based internal solution (in mM: 145 KCl, 1 MgCl<sub>2</sub>, 10 HEPES, 1.1 EGTA, 2-Mg-ATP,  
6 0.5 Na<sub>2</sub>-GTP; pH 7.3 with KOH) with osmolality between 280–290 mOsm.  
7 Electrophysiological properties of cells were monitored using an Axopatch 200B  
8 amplifier (Axon Instrument, Molecular Devices, Sunnyvale, CA). Output signals were  
9 low-pass filtered at 5 kHz and digitized at a sampling rate of 10 kHz. Patch clamp data  
10 were recorded through an analog-to-digital (AD) converter (Digidata 1550A; Molecular  
11 Devices) using pClamp 10.2 software (Molecular Devices). Voltage clamp recordings  
12 were performed at a holding potential of -60 mV, unless otherwise stated. Blue light at a  
13 wavelength of 475  $\pm$  18 nm and yellow light at a wavelength of 575  $\pm$  13 nm were  
14 generated by a light source that used a light-emitting diode (Spectra Light Engine;  
15 Lumencor, Beaverton, OR) and guided to the microscope stage with a 1 cm diameter  
16 optical fiber. Brain slices were illuminated through the objective lens of the fluorescence  
17 microscope.

18

#### 19 *In vitro calcium imaging*

20 Gad67+ neurons were identified by green fluorescence of GCaMP6f. Excitation light of  
21 475  $\pm$  18 nm (6.8 mW/mm<sup>2</sup>) was emitted into the brain slice containing VTA through the  
22 objective lens of a fluorescence microscope. The light source (Spectra light engine) was  
23 controlled by the Metamorph software (Molecular Devices). GCaMP6f fluorescence  
24 intensity was recorded continuously using the Metamorph software at a rate of 1 Hz with  
25 100 msec of exposure time. To synchronize the calcium imaging and patch clamp  
26 recording, pClamp software was triggered by the TTL output from Metamorph software.  
27 Metamorph data were analyzed by setting the region of interest (ROI) on GCaMP6f  
28 expressing VTA<sub>Gad67+</sub> neurons and the  $\Delta F/F$  was calculated from the average intensity of  
29 the ROI. Finally,  $\Delta F/F$  values for 10, 20 and 50 Hz were normalized to the  $\Delta F/F$  values  
30 for corresponding 100 Hz frequencies.

31

#### 32 *Data Analysis and Presentation*

33 Immunostaining data were analyzed and processed with ImageJ (US National Institute  
34 of Health) and BZ-X Analyzer (Keyence BZ-X710 microscope). Electrophysiological  
35 analysis was performed with either Clampfit10 (Molecular Devices, Sunnyvale, CA) or  
36 Minianalysis software (Synaptosoft Inc., Decatur, GA). Analysis of EEG-EMG data was  
37 performed using SleepSign software (Kissei Comtec) and data were outputted as text  
38 files. Further analyses were performed using Microsoft Excel. Electrophysiological data  
39 were saved as American Standard Code for Information Interchange (ASCII) files and  
40 further data calculations were performed in Microsoft Excel. Graphs were generated in  
41 Origin 2017 (OriginLab, Northampton, MA) using data from Excel. Statistical analysis

- 1 was also performed with Origin 2017. Graphs were generated using Canvas 15 (ACD
- 2 Systems, Seattle, WA).

## References

- 1 Anaclet, C., Pedersen, N.P., Ferrari, L.L., Venner, A., Bass, C.E., Arrigoni, E., and Fuller,  
2 P.M. (2015). Basal forebrain control of wakefulness and cortical rhythms. *Nature*  
3 *communications* 6, 8744.
- 4 Arsenault, J.T., Rima, S., Stemmann, H., and Vanduffel, W. (2014). Role of the primate  
5 ventral tegmental area in reinforcement and motivation. *Curr Biol* 24, 1347-1353.
- 6 Berndt, A., Schoenenberger, P., Mattis, J., Tye, K.M., Deisseroth, K., Hegemann, P., and  
7 Oertner, T.G. (2011). High-efficiency channelrhodopsins for fast neuronal stimulation at  
8 low light levels. *Proceedings of the National Academy of Sciences of the United States*  
9 *of America* 108, 7595-7600.
- 10 Brown, R.E., Basheer, R., McKenna, J.T., Strecker, R.E., and McCarley, R.W. (2012).  
11 Control of sleep and wakefulness. *Physiol Rev* 92, 1087-1187.
- 12 Bushey, D., Tononi, G., and Cirelli, C. (2011). Sleep and Synaptic Homeostasis:  
13 Structural Evidence in *Drosophila*. *Science* 332, 1576.
- 14 Chen, T.-W., Wardill, T.J., Sun, Y., Pulver, S.R., Renninger, S.L., Baohan, A., Schreiter,  
15 E.R., Kerr, R.A., Orger, M.B., Jayaraman, V., *et al.* (2013). Ultrasensitive fluorescent  
16 proteins for imaging neuronal activity. *Nature* 499, 295.
- 17 Chowdhury, S., and Yamanaka, A. (2016). Optogenetic activation of serotonergic  
18 terminals facilitates GABAergic inhibitory input to orexin/hypocretin neurons. *Scientific*  
19 *reports* 6, 36039.
- 20 Dahan, L., Astier, B., Vautrelle, N., Urbain, N., Kocsis, B., and Chouvet, G. (2007).  
21 Prominent burst firing of dopaminergic neurons in the ventral tegmental area during  
22 paradoxical sleep. *Neuropsychopharmacology : official publication of the American*  
23 *College of Neuropsychopharmacology* 32, 1232-1241.
- 24 Eban-Rothschild, A., Rothschild, G., Giardino, W.J., Jones, J.R., and de Lecea, L.  
25 (2016). VTA dopaminergic neurons regulate ethologically relevant sleep-wake  
26 behaviors. *Nature Neuroscience* 19, 1356.
- 27 Erlander, M.G., Tillakaratne, N.J., Feldblum, S., Patel, N., and Tobin, A.J. (1991). Two  
28 genes encode distinct glutamate decarboxylases. *Neuron* 7, 91-100.
- 29 Faget, L., Osakada, F., Duan, J., Ressler, R., Johnson, A.B., Proudfoot, J.A., Yoo, J.H.,  
30 Callaway, E.M., and Hnasko, T.S. (2016). Afferent Inputs to Neurotransmitter-Defined  
31 Cell Types in the Ventral Tegmental Area. *Cell Rep* 15, 2796-2808.
- 32 Fields, H.L., Hjelmstad, G.O., Margolis, E.B., and Nicola, S.M. (2007). Ventral

- 1 Tegmental Area Neurons in Learned Appetitive Behavior and Positive Reinforcement.  
2 Annual Review of Neuroscience 30, 289-316.
- 3 Higo, S., Akashi, K., Sakimura, K., and Tamamaki, N. (2009). Subtypes of GABAergic  
4 neurons project axons in the neocortex. Front Neuroanat 3, 25.
- 5 Inutsuka, A., and Yamanaka, A. (2013). The physiological role of orexin/hypocretin  
6 neurons in the regulation of sleep/wakefulness and neuroendocrine functions. Frontiers  
7 in endocrinology 4, 18-18.
- 8 Inutsuka, A., Yamashita, A., Chowdhury, S., Nakai, J., Ohkura, M., Taguchi, T., and  
9 Yamanaka, A. (2016). The integrative role of orexin/hypocretin neurons in nociceptive  
10 perception and analgesic regulation. Scientific reports 6, 29480.
- 11 Joiner, W.J. (2016). Unraveling the Evolutionary Determinants of Sleep. Curr Biol 26,  
12 R1073-r1087.
- 13 Jones, B.E., Bobillier, P., Pin, C., and Jouvet, M. (1973). The effect of lesions of  
14 catecholamine-containing neurons upon monoamine content of the brain and EEG and  
15 behavioral waking in the cat. Brain Research 58, 157-177.
- 16 Lancel, M., van Riezen, H., and Glatt, A. (1992). Enhanced slow-wave activity within  
17 NREM sleep in the cortical and subcortical EEG of the cat after sleep deprivation. Sleep  
18 15, 102-118.
- 19 Lee, R.S., Steffensen, S.C., and Henriksen, S.J. (2001). Discharge profiles of ventral  
20 tegmental area GABA neurons during movement, anesthesia, and the sleep-wake cycle.  
21 J Neurosci 21, 1757-1766.
- 22 Liu, K., Kim, J., Kim, D.W., Zhang, Y.S., Bao, H., Denaxa, M., Lim, S.A., Kim, E., Liu, C.,  
23 Wickersham, I.R., *et al.* (2017). Lhx6-positive GABA-releasing neurons of the zona  
24 incerta promote sleep. Nature 548, 582-587.
- 25 Mohammad, F., Stewart, J.C., Ott, S., Chlebikova, K., Chua, J.Y., Koh, T.W., Ho, J., and  
26 Claridge-Chang, A. (2017). Optogenetic inhibition of behavior with anion  
27 channelrhodopsins. Nat Methods 14, 271-274.
- 28 Nair-Roberts, R.G., Chatelain-Badie, S.D., Benson, E., White-Cooper, H., Bolam, J.P.,  
29 and Ungless, M.A. (2008). Stereological estimates of dopaminergic, GABAergic and  
30 glutamatergic neurons in the ventral tegmental area, substantia nigra and retrorubral  
31 field in the rat. Neuroscience 152, 1024-1031.
- 32 Oishi, Y., Suzuki, Y., Takahashi, K., Yonezawa, T., Kanda, T., Takata, Y., Cherasse, Y.,  
33 and Lazarus, M. (2017a). Activation of ventral tegmental area dopamine neurons

1 produces wakefulness through dopamine D2-like receptors in mice. *Brain structure &*  
2 *function* 222, 2907-2915.

3 Oishi, Y., Xu, Q., Wang, L., Zhang, B.J., Takahashi, K., Takata, Y., Luo, Y.J., Cherasse,  
4 Y., Schiffmann, S.N., de Kerchove d'Exaerde, A., *et al.* (2017b). Slow-wave sleep is  
5 controlled by a subset of nucleus accumbens core neurons in mice. *Nature*  
6 *communications* 8, 734.

7 Pignatelli, M., and Bonci, A. (2015). Role of Dopamine Neurons in Reward and  
8 Aversion: A Synaptic Plasticity Perspective. *Neuron* 86, 1145-1157.

9 Rasch, B., and Born, J. (2013). About sleep's role in memory. *Physiological reviews* 93,  
10 681-766.

11 Saito, Y.C., Maejima, T., Nishitani, M., Hasegawa, E., Yanagawa, Y., Mieda, M., and  
12 Sakurai, T. (2018). Monoamines Inhibit GABAergic Neurons in Ventrolateral Preoptic  
13 Area That Make Direct Synaptic Connections to Hypothalamic Arousal Neurons. *J*  
14 *Neurosci* 38, 6366-6378.

15 Sakurai, T. (2007). The neural circuit of orexin (hypocretin): maintaining sleep and  
16 wakefulness. *Nat Rev Neurosci* 8, 171-181.

17 Saper, C.B., Fuller, P.M., Pedersen, N.P., Lu, J., and Scammell, T.E. (2010). Sleep State  
18 Switching. *Neuron* 68, 1023-1042.

19 Scammell, T.E., Arrigoni, E., and Lipton, J.O. (2017). Neural Circuitry of Wakefulness  
20 and Sleep. *Neuron* 93, 747-765.

21 Schmidt, M.H. (2014). The energy allocation function of sleep: A unifying theory of sleep,  
22 torpor, and continuous wakefulness. *Neuroscience & Biobehavioral Reviews* 47,  
23 122-153.

24 Shank, E.J., Seitz, P.K., Bubar, M.J., Stutz, S.J., and Cunningham, K.A. (2007).  
25 Selective ablation of GABA neurons in the ventral tegmental area increases  
26 spontaneous locomotor activity. *Behavioral neuroscience* 121, 1224-1233.

27 Siegel, J.M. (2008). Do all animals sleep? *Trends in Neurosciences* 31, 208-213.

28 Tabuchi, S., Tsunematsu, T., Black, S.W., Tominaga, M., Maruyama, M., Takagi, K.,  
29 Minokoshi, Y., Sakurai, T., Kilduff, T.S., and Yamanaka, A. (2014). Conditional Ablation  
30 of Orexin/Hypocretin Neurons: A New Mouse Model for the Study of Narcolepsy and  
31 Orexin System Function. *The Journal of Neuroscience* 34, 6495-6509.

32 Takata, Y., Oishi, Y., Zhou, X.-Z., Hasegawa, E., Takahashi, K., Cherasse, Y., Sakurai, T.,  
33 and Lazarus, M. (2018). Sleep and wakefulness are controlled by ventral medial



- 1 midbrain/pons GABAergic neurons in mice. *The Journal of Neuroscience*, 0598-0518.
- 2 Tan, Kelly R., Yvon, C., Turiault, M., Mirzabekov, Julie J., Doehner, J., Labouèbe, G.,  
3 Deisseroth, K., Tye, Kay M., and Lüscher, C. (2012). GABA Neurons of the VTA Drive  
4 Conditioned Place Aversion. *Neuron* 73, 1173-1183.
- 5 van Zessen, R., Phillips, Jana L., Budygin, Evgeny A., and Stuber, Garret D. (2012).  
6 Activation of VTA GABA Neurons Disrupts Reward Consumption. *Neuron* 73,  
7 1184-1194.
- 8 Winton-Brown, T.T., Fusar-Poli, P., Ungless, M.A., and Howes, O.D. (2014).  
9 Dopaminergic basis of salience dysregulation in psychosis. *Trends Neurosci* 37, 85-94.
- 10 Wulff, K., Gatti, S., Wettstein, J.G., and Foster, R.G. (2010). Sleep and circadian rhythm  
11 disruption in psychiatric and neurodegenerative disease. *Nat Rev Neurosci* 11, 589-599.
- 12 Xie, L., Kang, H., Xu, Q., Chen, M.J., Liao, Y., Thiyagarajan, M., O'Donnell, J.,  
13 Christensen, D.J., Nicholson, C., Iliff, J.J., *et al.* (2013). Sleep drives metabolite  
14 clearance from the adult brain. *Science* 342, 373-377.
- 15 Yang, S.R., Hu, Z.Z., Luo, Y.J., Zhao, Y.N., Sun, H.X., Yin, D., Wang, C.Y., Yan, Y.D.,  
16 Wang, D.R., Yuan, X.S., *et al.* (2018). The rostromedial tegmental nucleus is essential  
17 for non-rapid eye movement sleep. *PLoS biology* 16, e2002909.
- 18 Yu, X., Li, W., Ma, Y., Tossell, K., Harris, J.J., Harding, E.C., Ba, W., Miracca, G., Wang,  
19 D., Li, L., *et al.* (2019). GABA and glutamate neurons in the VTA regulate sleep and  
20 wakefulness. *Nature Neuroscience* 22, 106-119.

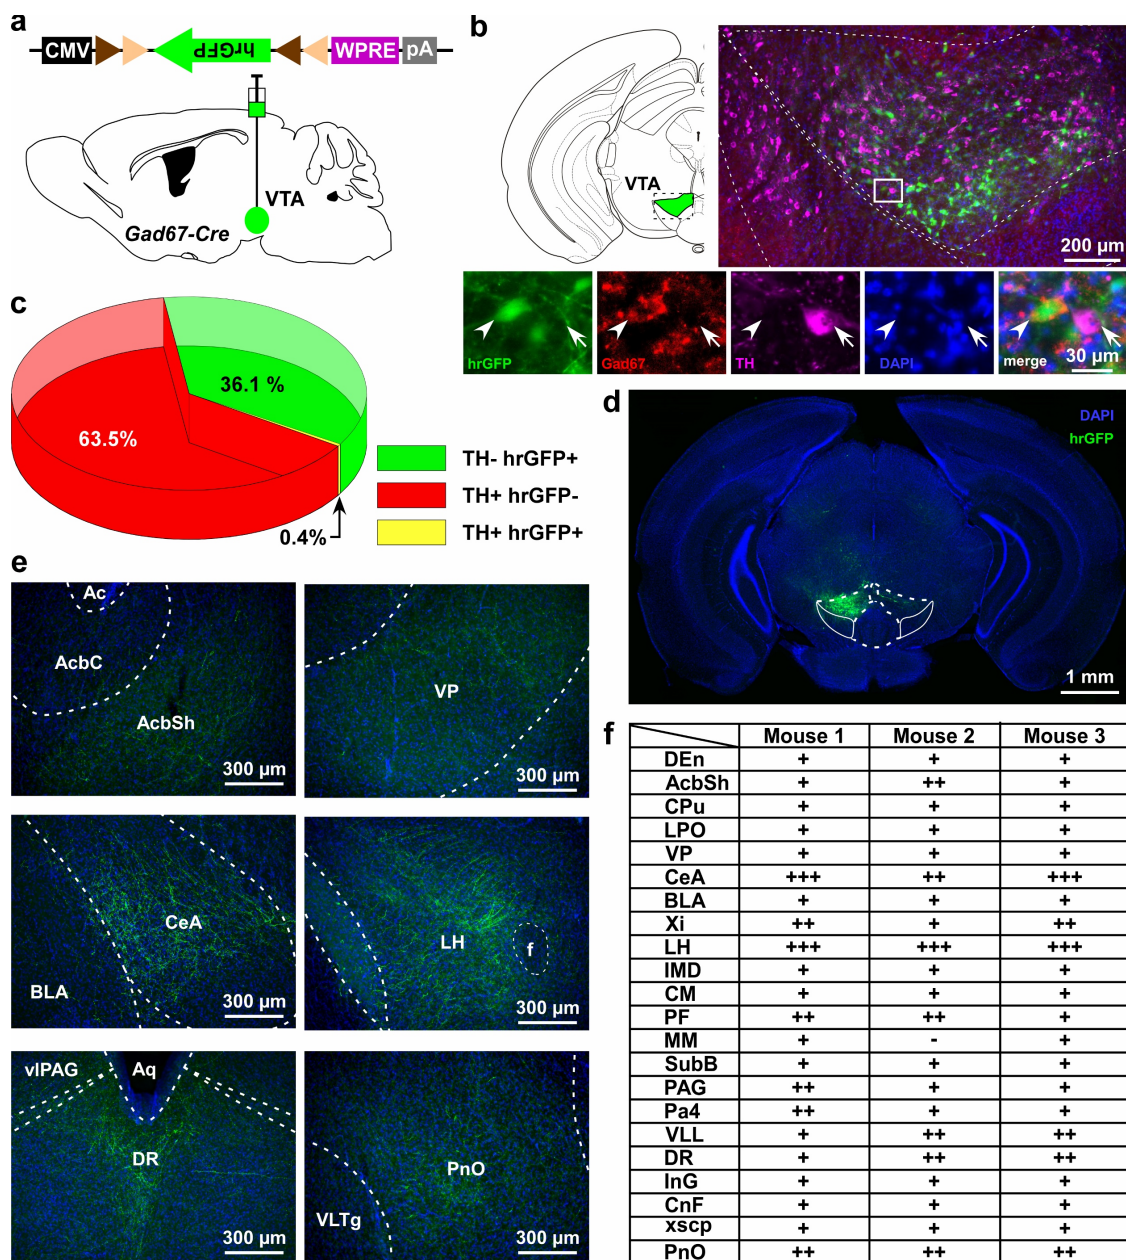

1  
2 **Figure 1:** VTA<sub>Gad67+</sub> neurons project to multiple areas in the brain. a) Schematic of AAV  
3 injection to express Cre-inducible hrGFP in *Gad67-Cre* mice. The dotted brain map area  
4 is shown to the right. White rectangular area is shown below. b) Immunohistochemical  
5 studies showing expression of hrGFP in *Gad67+* neurons (arrowhead), but not in the  
6 nearby DA (arrow) neurons. c) Pie chart showing the percent of hrGFP expression in DA  
7 and non-DA neurons in the VTA (n = 4). d and e) Expression of hrGFP in VTA<sub>Gad67+</sub>  
8 neurons and some of their projected brain areas shown. f) Table showing the  
9 comparative scoring of hrGFP signals across different brain areas. Abbreviations- DEn:  
10 dorsal endopiriform nucleus, AcbC: accumbens nucleus, core, AcbSh: accumbens

1 nucleus, shell, CPu: caudate putamen (striatum), LPO: lateral preoptic area, VP: ventral  
2 pallidum, CeA: central nucleus of the amygdala, BLA: basolateral amygdala, Xi: xiphoid  
3 thalamic nucleus, LH: lateral hypothalamic area, IMD: intermediodorsal thalamic  
4 nucleus, CM: central medial thalamic nucleus, PF: parafascicular thalamic nucleus, MM:  
5 medial mammillary nucleus, SubB: subbrachial nucleus, PAG: periaqueductal gray,  
6 Pa4: paratrochlear nucleus, VLL: ventral nucleus of the lateral lemniscus, DR: dorsal  
7 raphe nucleus, InG: intermediate gray layer of the superior colliculus, CnF: cuneiform  
8 nucleus, xscp: decussation of the superior cerebellar peduncle, and PnO: pontine  
9 reticular nucleus.

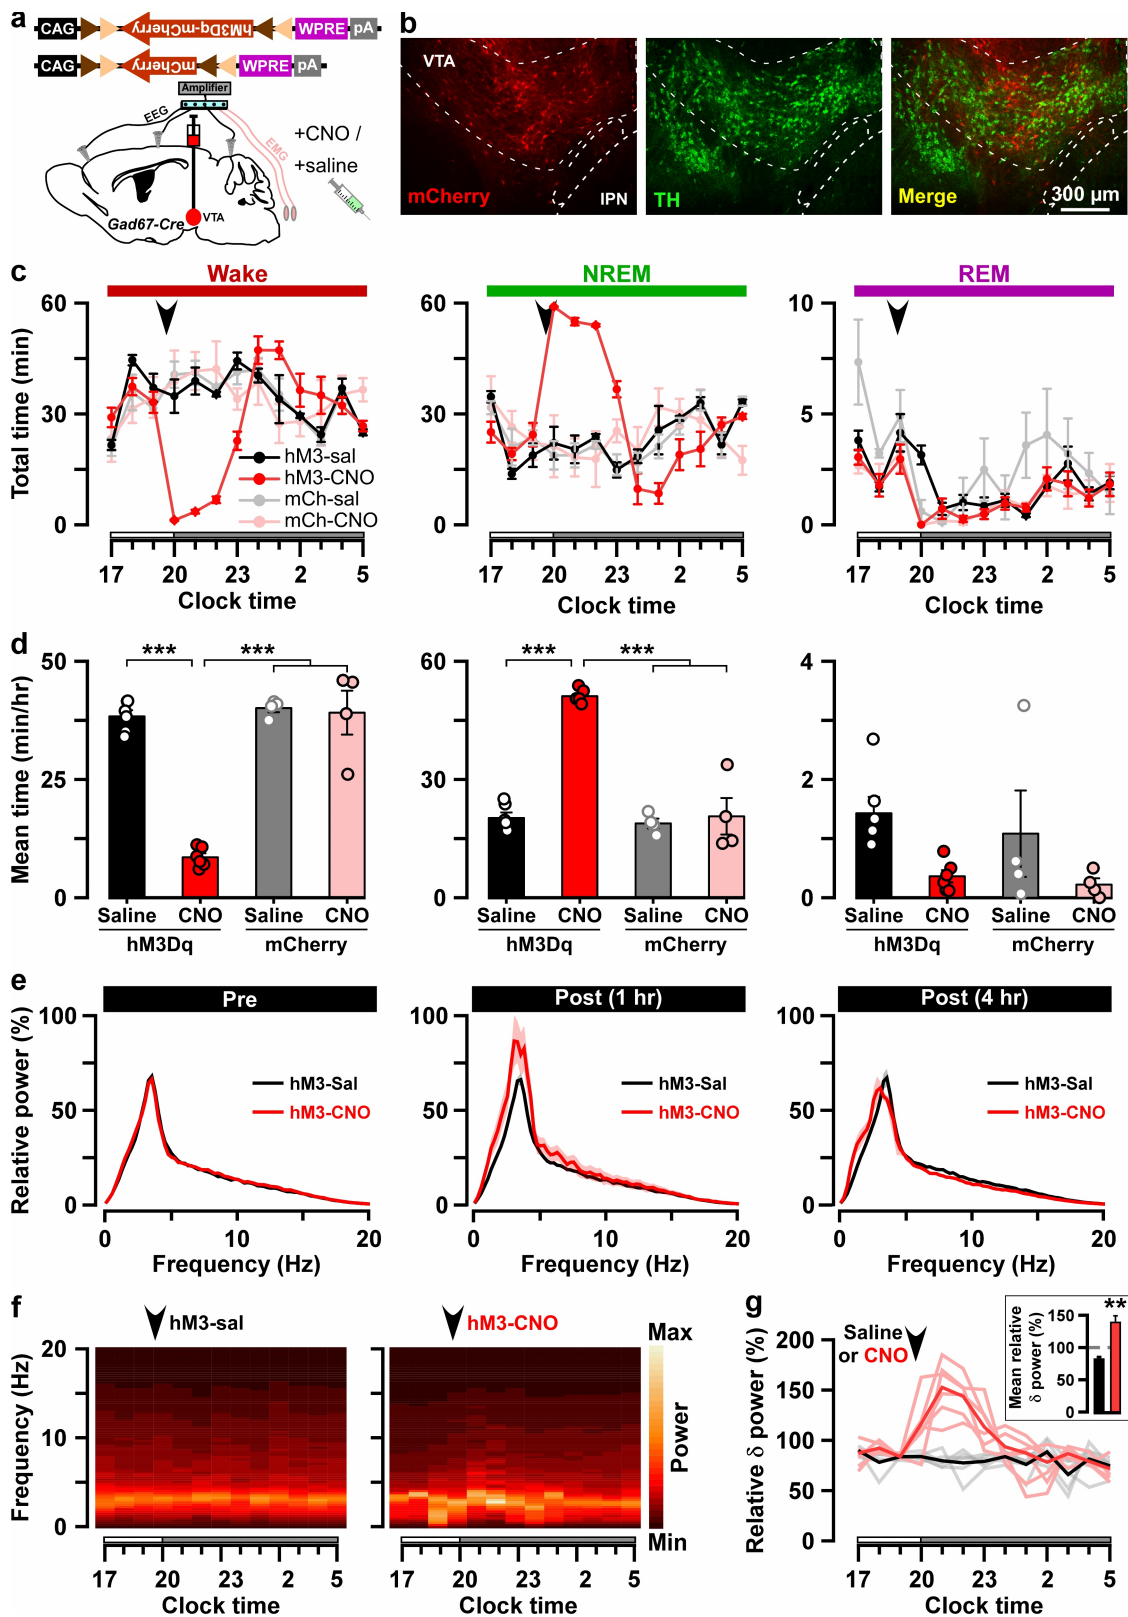

1

2 **Figure 2:** Chemogenetic activation of VTA<sub>Gad67+</sub> neurons induced long-lasting NREM

3 sleep. a) Schematic of Cre-inducible expression of either hM3Dq-mCherry or mCherry

4 in VTA<sub>Gad67+</sub> neurons. b) Immunohistochemical confirmation of hM3Dq-mCherry

1 expression in the VTA non-DA neurons. c) Time spent in each vigilance state before and  
2 after i.p. administration of either saline or CNO. Arrowhead indicates timing of injection  
3 (just before the dark period; hM3Dq: n = 6 mice; mCherry: n = 4 mice). White and grey  
4 bars above the x-axis indicate light and dark periods, respectively. d) 4 hr average time  
5 spent in each vigilance states after i.p. administration. e) Relative power of fast Fourier  
6 transformation (FFT) analysis of NREM sleep for hM3Dq-expressing saline and CNO  
7 groups before (pre: left) and after (1 hr post: middle, 4 hr post: right) i.p. administration.  
8 f) Heatmap showing a trace indicating that delta wave power activity increases after  
9 CNO administration compared to the saline control. g) Summary of the delta wave  
10 power change after saline or CNO injection. Traces in dark color indicate mean value,  
11 while lighter color indicates EEG spectrum of each mice injected with saline (black) and  
12 CNO (red). Inset shows the mean relative delta power for 4 hr after either saline or CNO  
13 administration. Data are shown as the mean  $\pm$  SEM (hM3Dq: n = 6 mice; mCherry: n = 4  
14 mice). \*  $p < 0.05$ , \*\*\*  $p < 0.001$ , (d) Two-way ANOVA followed by Tukey post hoc, (e)  
15 two-tailed paired student's  $t$ -test (n = 8 mice).  
16

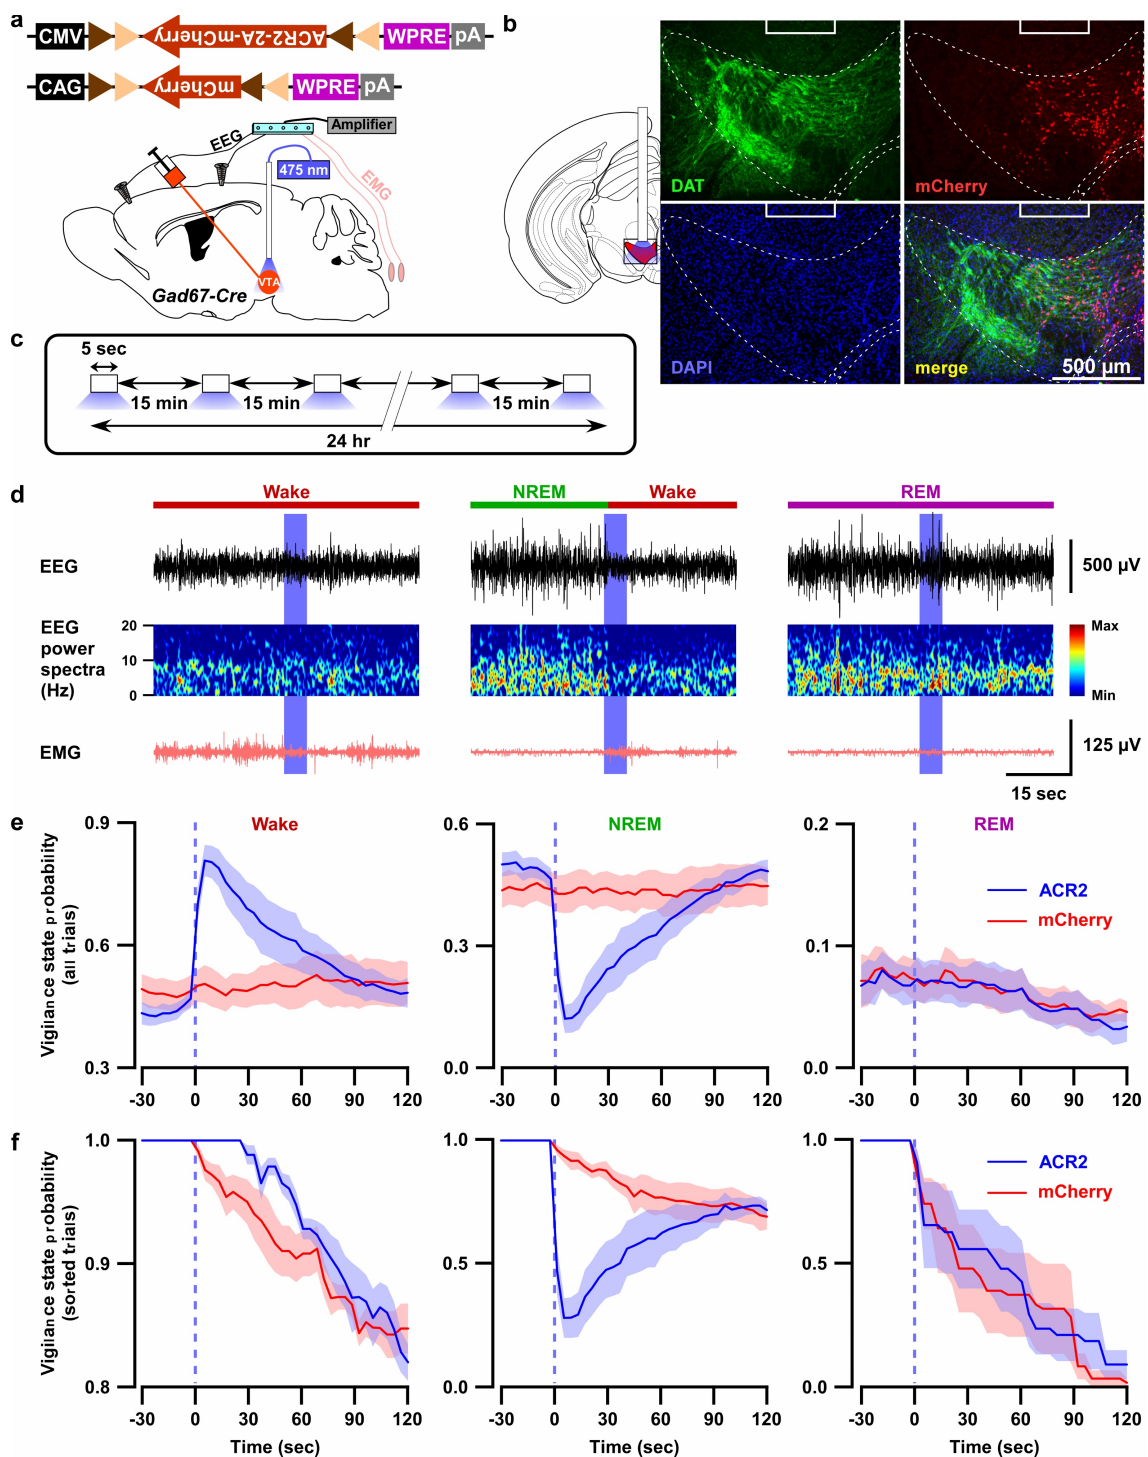

1

2 **Figure 3:** Optogenetic inhibition of  $\text{VTA}_{\text{Gad67}^+}$  neurons induced wakefulness from NREM  
 3 sleep, but not from REM sleep. a) Schematic of surgery showing *Gad67-Cre* mice  
 4 expressing either ACR2-2A-mCherry or mCherry alone that were subjected to  
 5 implantation of fiber optics and EEG-EMG electrodes. b) Schematic of fiber optic  
 6 implantation (left). Pictures indicate position of tip of fiber optics and ACR2-2A-mCherry  
 7 expression and DAT-positive neurons in the VTA. c) Schematic of protocol for light

1 stimulation in optogenetic inhibition experiments. d) Representative traces showing  
2 EEG, EEG power spectra, and EMG during optogenetic inhibition in different vigilance  
3 states (wake, NREM, and REM sleep). Vigilance states are indicated by colored bars  
4 above the EEG traces. e) Probability of vigilance state before and after light illumination  
5 in all recorded trials of ACR2-2A-mCherry or mCherry-alone expressing mice. Blue and  
6 red lines indicate mean probability of each vigilance state, ACR2-2A-mCherry (n = 6)  
7 and mCherry (n = 5). f) Light illumination in wakefulness, NREM, or REM sleep was  
8 isolated from (e). Each vigilance state lasted for at least 30 sec before light illumination  
9 was isolated. SEM is indicated as the lighter color band.

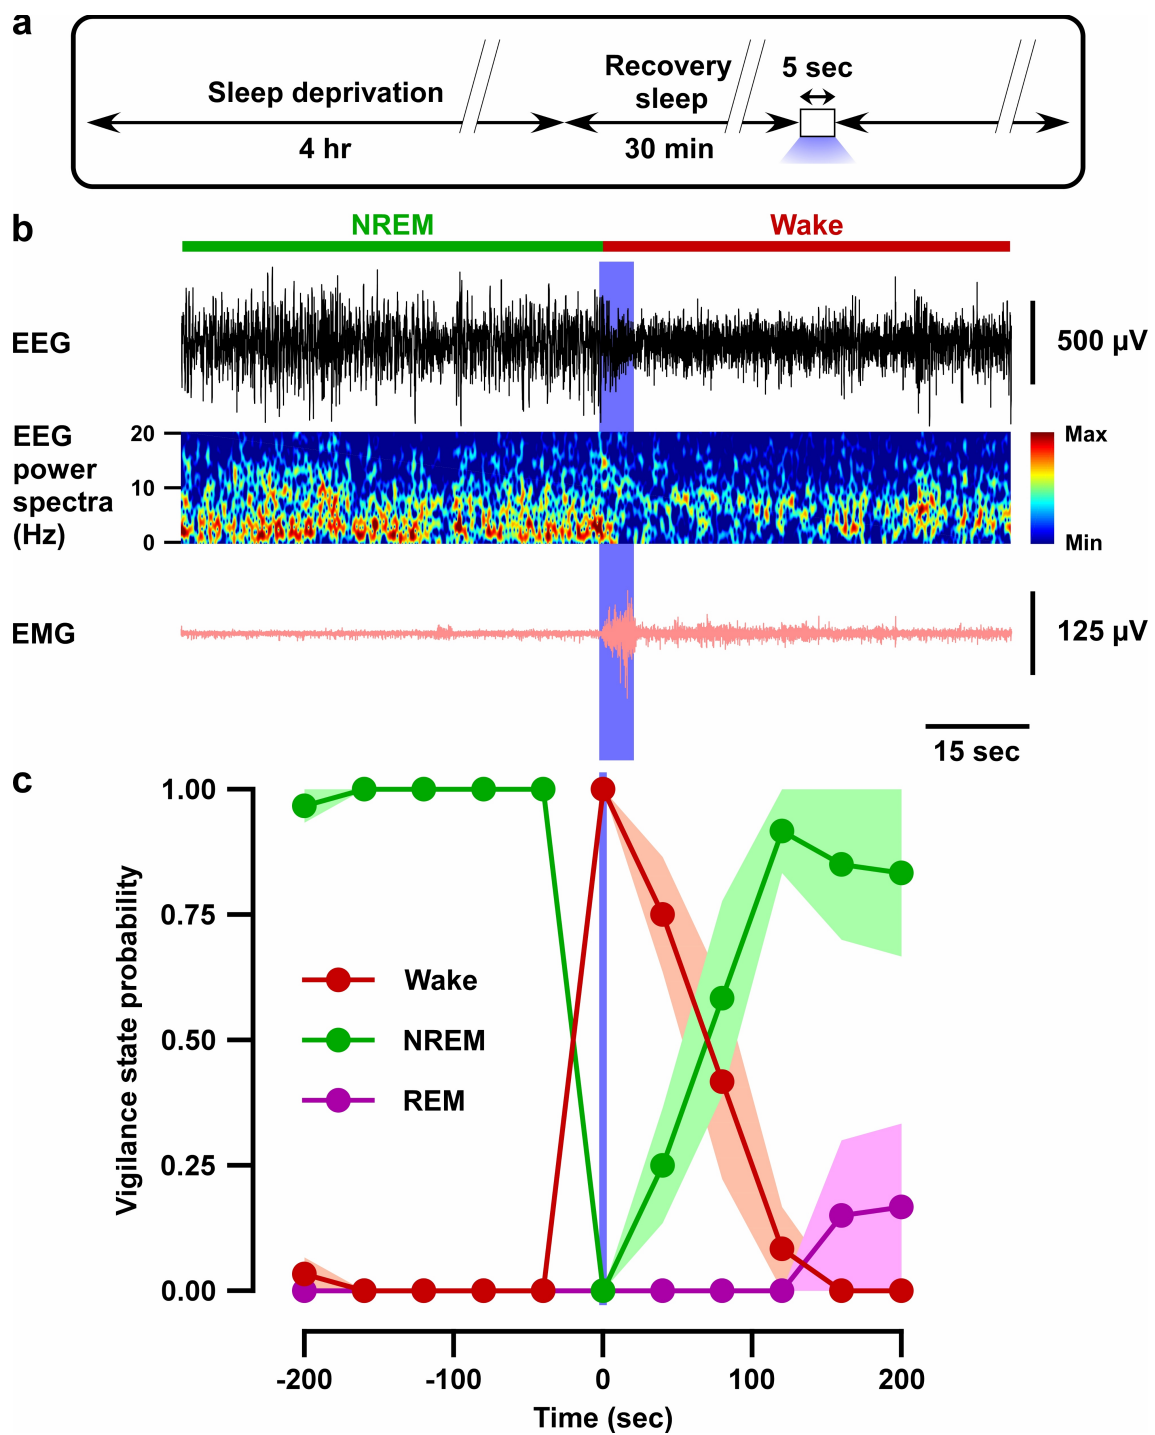

1  
2 **Figure 4:** Optogenetic inhibition of  $VTA_{Gad67+}$  neurons induced wakefulness even under  
3 conditions of high homeostatic sleep pressure. a) Schematic of the protocol of the  
4 experiment. b) EEG, EEG power spectra, and EMG before and after optogenetic  
5 inhibition during recovery sleep after 4 hr sleep deprivation. c) Summary of the  
6 experiment in (a) showing the probability of each vigilance state before and after blue  
7 light illumination. Colored circles and lines indicate mean probability of each vigilance



1 state and shaded area indicates SEM (ACR2-2A-mCherry: n = 6) and mCherry alone: n  
2 = 5).

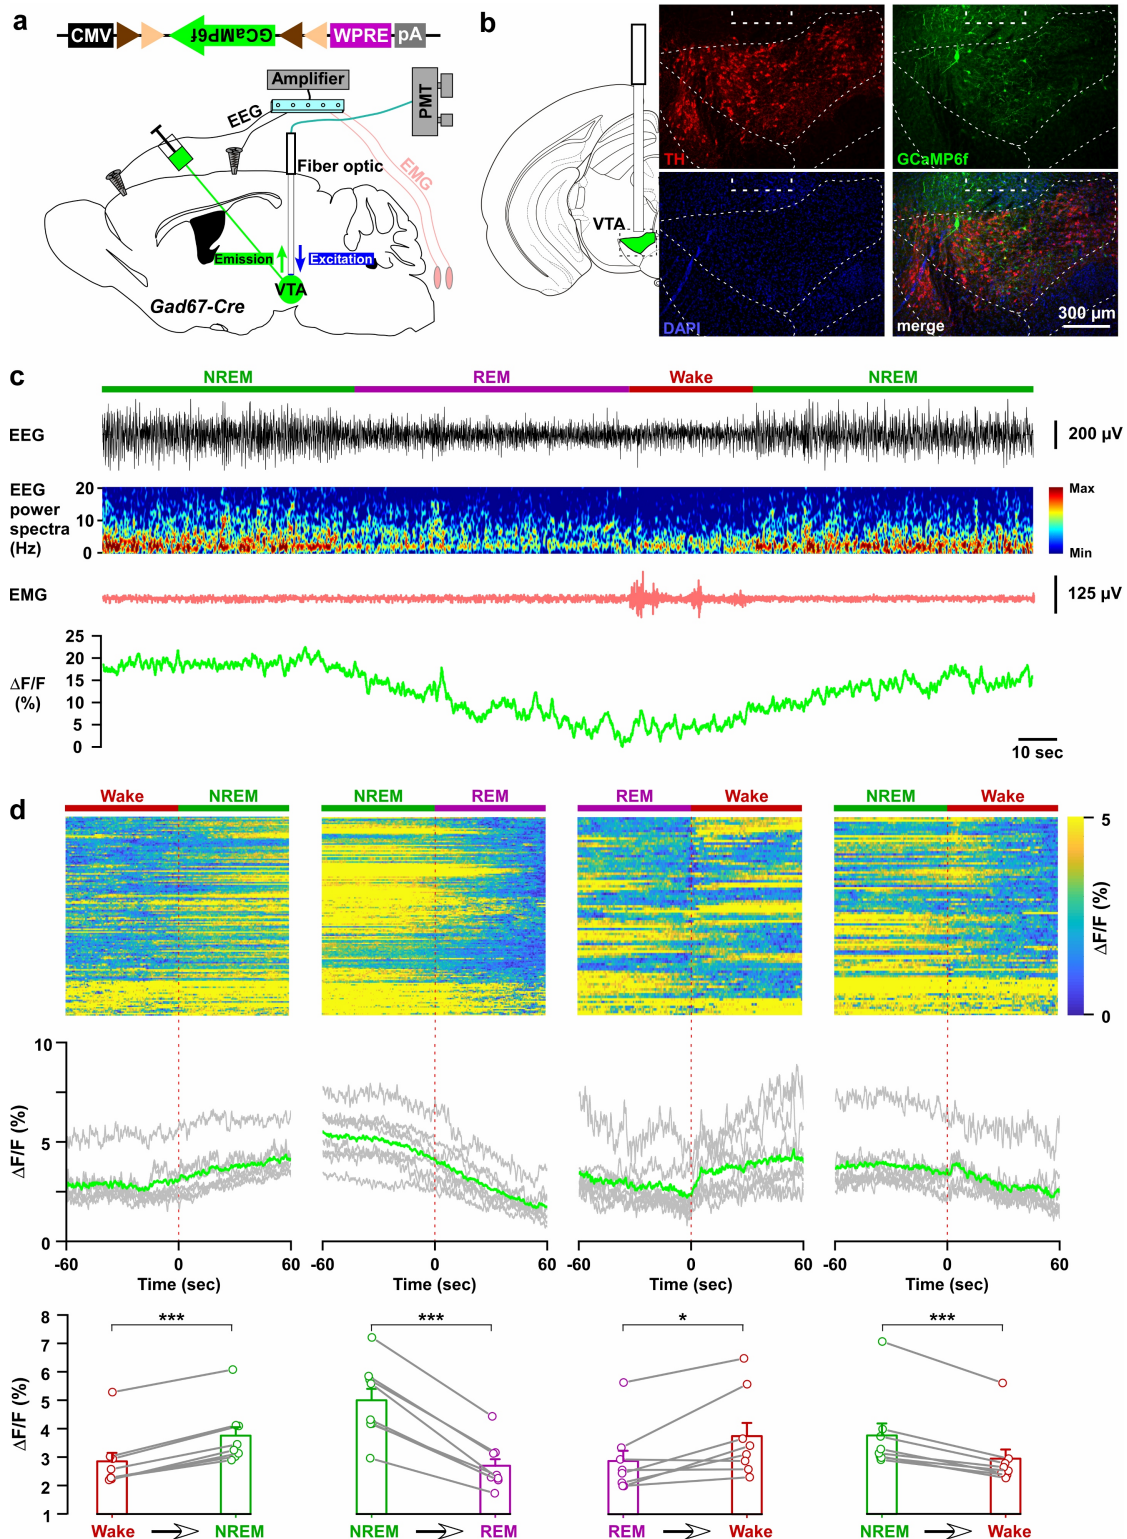

1  
 2 **Figure 5:** *In vivo* activity recordings of  $\text{VTA}_{\text{Gad67}^+}$  neurons using fiber photometry. a)  
 3 Schematic of GCaMP6f expression in  $\text{VTA}_{\text{Gad67}^+}$  neurons and position of fiber optics.  
 4 *Gad67-Cre* mice expressing GCaMP6f were subjected to implantation of guide cannula,  
 5 EEG, and EMG electrodes. PMT indicates photomultiplier tube. b)

1 Immunohistochemical studies confirmed that GCaMP6f expression was in the  
2 TH-negative cells in the VTA. c) Representative traces of EEG, EEG spectra, EMG, and  
3 fluorescent intensity from GCaMP6f (represented as  $\Delta F/F$ ) in a trial having all different  
4 states. Vigilance states were determined by EEG and EMG signals and indicated by  
5 colored bars. d) Fluorescent intensity alterations in each trial 60 sec before and after  
6 vigilance state changes. Upper panel shows the heat map of all separated transitions.  
7 Middle panel represents the changes in the intensity of calcium signals represented as  
8  $\Delta F/F$ . Grey lines indicate average intensities in individual mice and the green line  
9 indicates the mean of all mice. Lower panel indicates the average intensity separated  
10 for specific vigilance states. Data are represented as mean  $\pm$  SEM. \*\*\*,  $p < 0.001$ ; \*,  $p <$   
11  $0.05$ . Two-tailed paired student's  $t$ -test ( $n = 8$  mice).

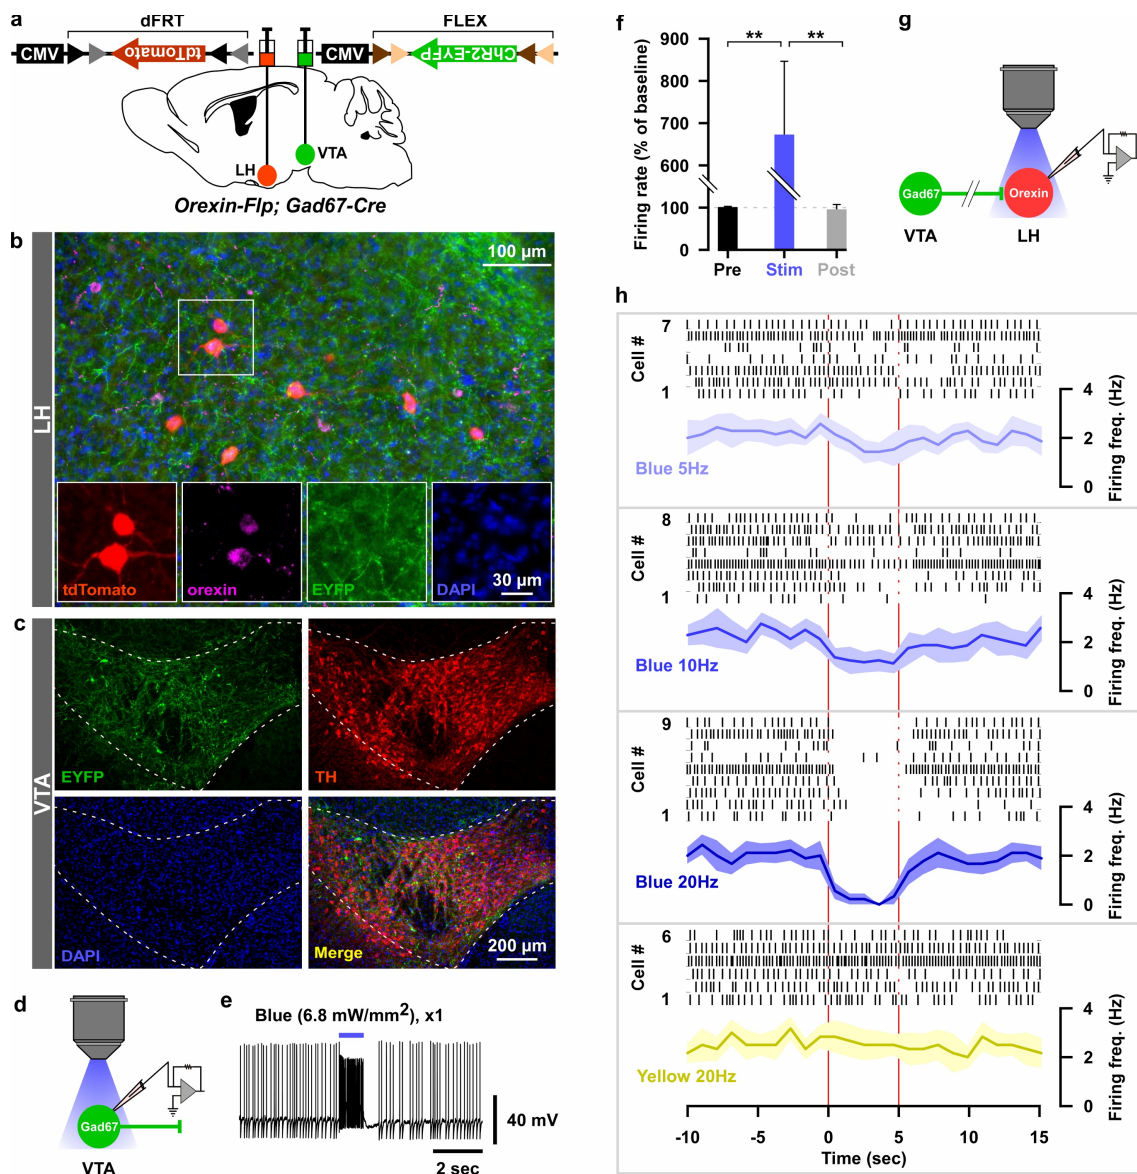

1  
2 **Figure 6:** Optogenetic activation of VTA<sub>Gad67+</sub> neuronal terminals in the LH inhibited  
3 orexin neurons *in vitro*. a) AAV-mediated gene expression in *orexin-Flp*; *Gad67-Cre*  
4 bigenic mice. b and c) Immunohistochemical studies confirmed expression of tdTomato  
5 exclusively in orexin neurons and ChR2 in non-TH-positive neurons in the VTA. d-f)  
6 Schematic and current clamp recordings from ChR2-expressing Gad67+ neurons in the  
7 VTA in acute brain slices. Blue light stimulation of 6.8 mW/mm<sup>2</sup> increased the firing up to  
8 674 ± 174% (n = 5, p = 0.004 vs both pre and post, one-way ANOVA followed by Tukey  
9 post hoc tests). g) Schematic of the experiments in (h). h) Firing of LH<sub>orexin</sub> neurons *in*  
10 *vitro* and effect of activation of VTA<sub>Gad67+</sub> neuronal terminals using different frequencies  
11 of blue lights (5, 10, or 20 Hz). Yellow light of 20 Hz was used as a negative control.  
12 Raster plot of each trial (upper panel) and running average of firing frequencies (lower

- 1 panel) of LH<sub>orexin</sub> neurons are indicated in each rectangular box following illumination of
- 2 the brain slice through the objective lens. Two vertical red lines indicate illumination start
- 3 (left) and stop (right) timing.

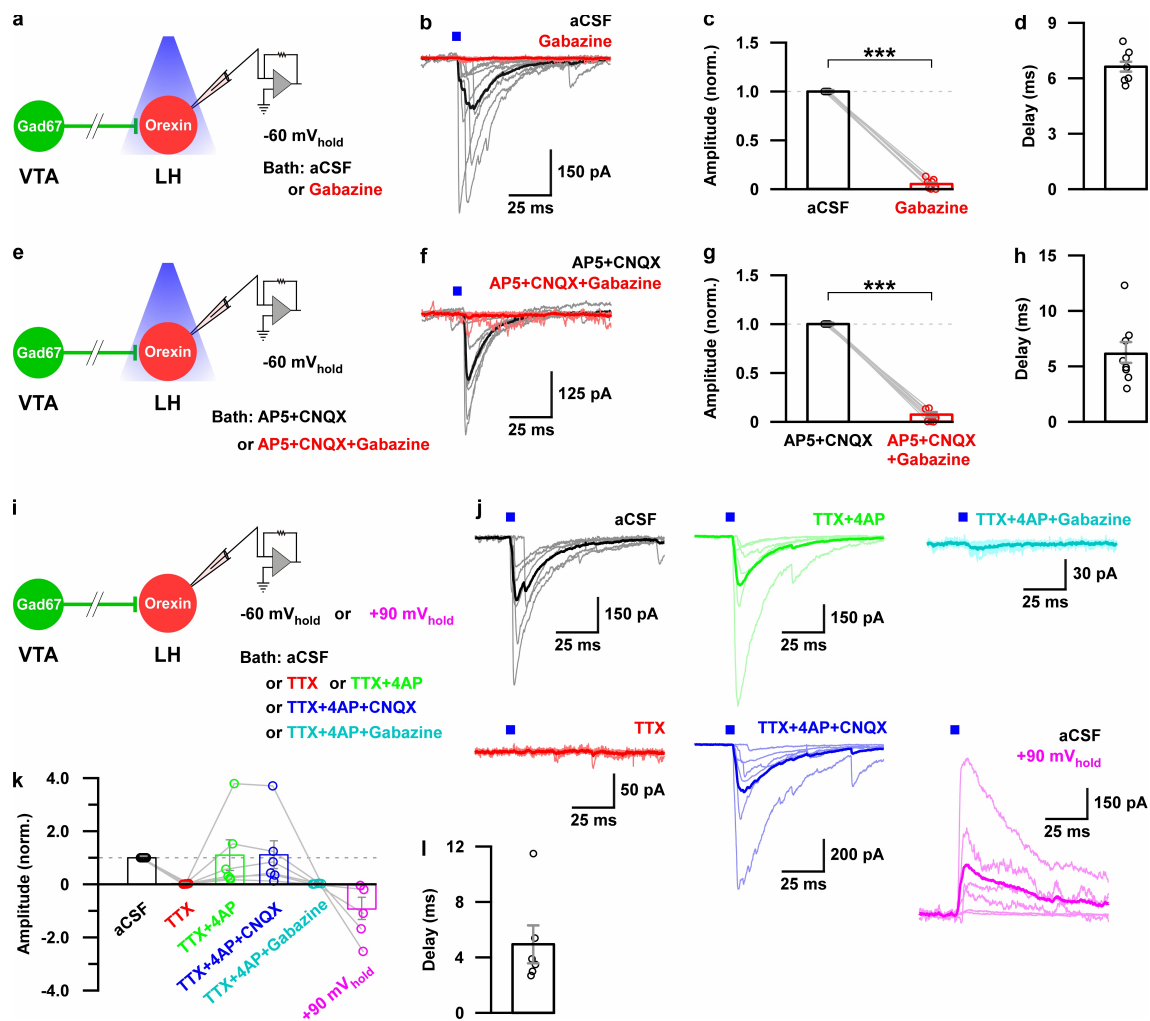

1  
2 **Figure 7:** Monosynaptic GABAergic input underlies the inhibitory effect of VTA<sub>Gad67+</sub>  
3 neurons onto LH<sub>orexin</sub> neurons. a) Schematic of experiments in b-d. b) Blue light pulses  
4 (5 ms) induced post-synaptic currents in the LH<sub>orexin</sub> neurons. The thicker line indicates  
5 average traces, and the thinner line indicates responses in individual cells (n = 8). c)  
6 Summary of the experiments in b showing the amplitude of current normalized to the  
7 aCSF application. d) Delay in response from light onset. e) Schematic of the  
8 experiments in f-h. f-h) Similar data representation as in (b-e) in the presence of  
9 glutamatergic and GABAergic antagonists. i) Schematic of the experiments j-l. j) The  
10 effect of glutamatergic and GABAergic antagonists and channel blockers on blue light  
11 pulse-induced currents (n = 7). k) Summary of the experiments in (j) showing the  
12 amplitude of current normalized to aCSF (n = 6). Data are represented as mean ± SEM.

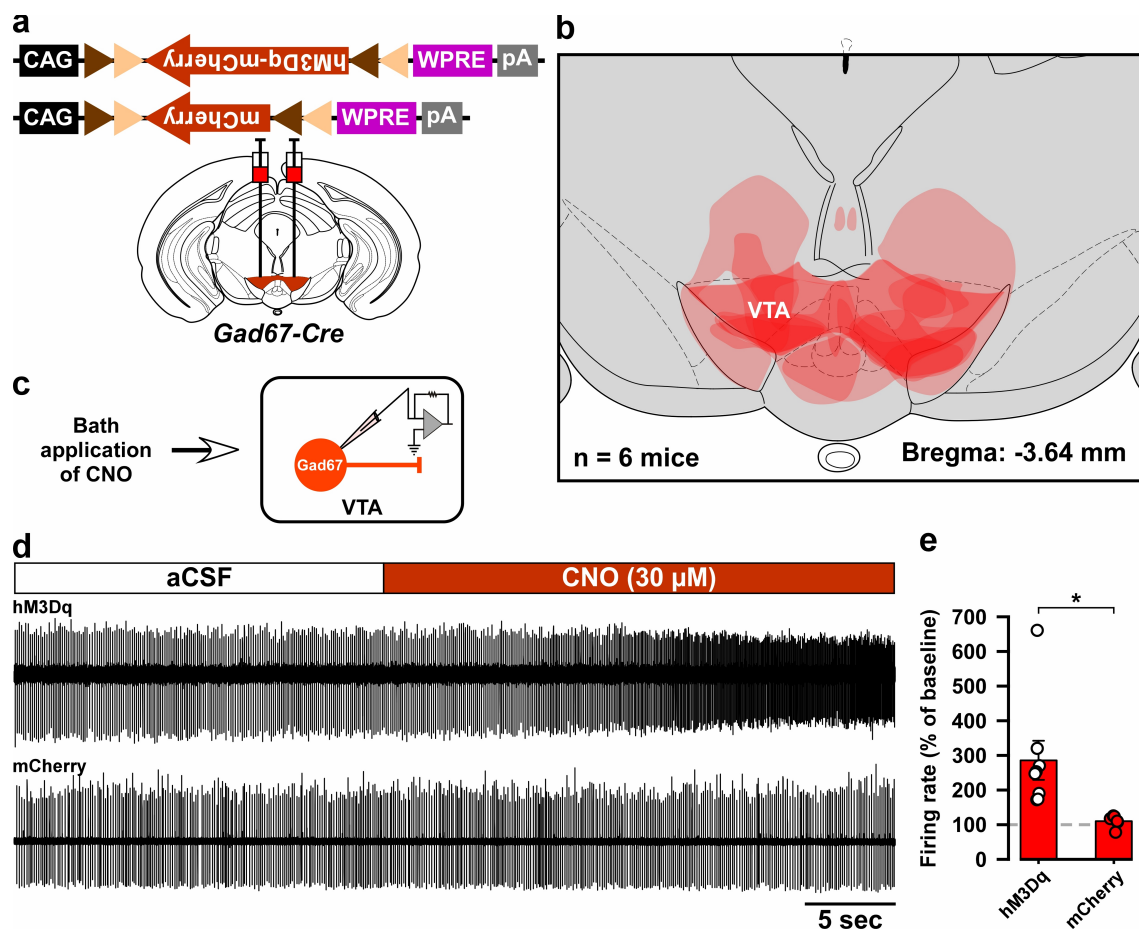

1  
2 **Supplementary Figure 1:** Histological and electrophysiological confirmation of the  
3 expression region and function of hM3Dq in the *Gad67-Cre* mice used in Figure 2. a)  
4 Schematic of Cre-mediated expression of either hM3Dq-mCherry or mCherry alone in  
5 *Gad67-Cre* mice. b) Histological verification and reconstruction of hM3Dq-mCherry  
6 expressing areas in mice used in Figure 2. c) Schematic of patch clamp recording from  
7 hM3Dq-mCherry- or mCherry-expressing neurons in the VTA while applying CNO  
8 through the bath solution. d) Traces showing CNO-induced increases in firing of  
9 VTA<sub>Gad67+</sub> neurons expressing hM3Dq-mCherry, but not of neurons expressing mCherry  
10 alone. e) Summary of experiment in (d) showing firing rate as a percent of baseline  
11 (average for 5 sec before CNO application). CNO was applied at a concentration of 30  
12 μM (hM3Dq: n = 8 and mCherry: n = 6,  $p = 0.02$ , two-tailed unpaired Student's *t*-test).  
13 Data are represented as mean ± SEM.

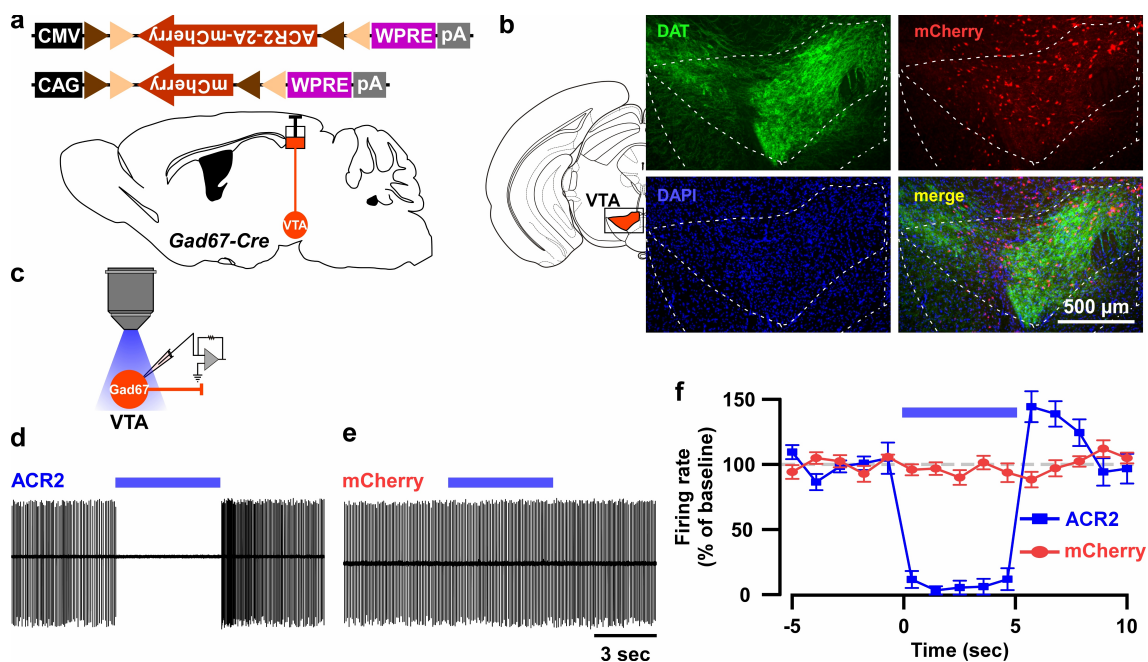

1  
2  
3  
4  
5  
6  
7  
8  
9  
10  
11  
12  
13  
14  
15

**Supplementary Figure 2:** *In vitro* confirmation of ACR2-mediated optogenetic inhibition of  $VTA_{Gad67+}$  neurons. a) Schematic of Cre-inducible expression of either ACR2 (AAV(9)-CMV-FLEX-ACR2-2A-mCherry, 300 nl each side,  $6.2 \times 10^{12}$  copies/ml) or mCherry (AAV(9)-CAG-FLEX-mCherry, 300 nl each side,  $1.9 \times 10^{12}$  copies/ml) in  $VTA_{Gad67+}$  neurons. b) Immunohistochemical confirmation that ACR2-2A-mCherry-positive  $Gad67+$  neurons are not co-expressing the dopamine transporter (DAT, expressed by DA neurons in the VTA). c) Schematic of recordings from ACR2-2A-mCherry or mCherry-expressing  $VTA_{Gad67+}$  neurons. d and e) Traces showing firing in a loose cell-attached mode from  $VTA_{Gad67+}$  neurons expressing either ACR2-2A-mCherry (d) or mCherry alone (e). f) Summary of experiment in (d) and (e), showing the firing rate as a percent of baseline (average for 5 sec before illumination). Blue light of  $6.8 \text{ mW/mm}^2$  was illuminated for 5 sec (ACR2:  $n = 10$  and mCherry:  $n = 7$ ). Data are represented as mean  $\pm$  SEM.



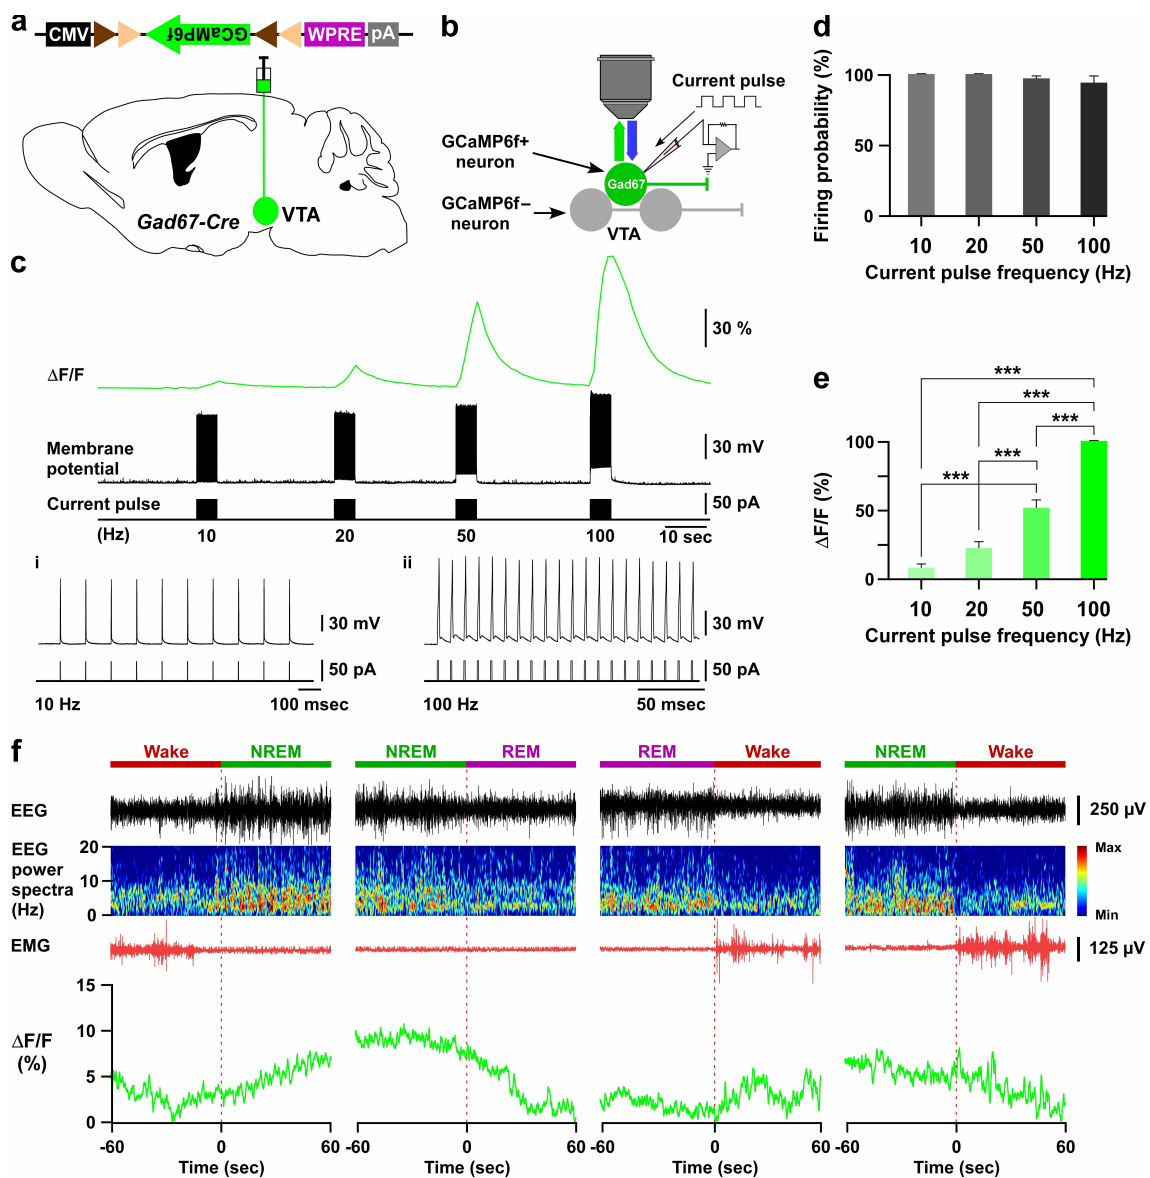

1  
 2 **Supplementary Figure 3: GCaMP6f-mediated recording of VTA<sub>Gad67+</sub> neuronal activity**  
 3 **in both *in vitro* and *in vivo*.** a and b) Schematic of Cre-inducible expression of GCaMP6f  
 4 in VTA<sub>Gad67+</sub> neurons (a), and simultaneous recording of membrane potential by  
 5 electrophysiology and changes in intracellular calcium concentration by calcium  
 6 imaging from GCaMP6f-expressing VTA<sub>Gad67+</sub> neurons (b) in brain slice using  
 7 *Gad67-Cre* mice. c) Representative traces showing the correlation between the action  
 8 potential frequency (middle trace) and the increase in calcium concentration intensity  
 9 ( $\Delta F/F$ , upper trace). Action potentials were generated by injecting depolarizing current  
 10 (~50 pA, lower trace) through the recording pipette at 10 Hz, 20 Hz, 50 Hz, and 100 Hz,  
 11 while the  $\Delta F/F$  was simultaneously measured from the same VTA<sub>Gad67+</sub> neuron. d,e) Summarized data showing

1 induced firing probability (d) and normalized  $\Delta F/F$  (d) of VTA<sub>Gad67+</sub> neurons from the  
2 experiment in (c) ( $n = 13$ ,  $p = 0.13$  (10 vs 20 Hz),  $p = 2.5e-8$  (10 vs 50 Hz),  $p = 1.0e-4$   
3 (20 vs 50 Hz),  $p = 0$  (10 vs 100, 20 vs 100 and 50 vs 100 Hz), one-way ANOVA followed  
4 by post hoc Tukey test). Data are represented as mean  $\pm$  SEM. f) Traces showing 4  
5 different types of vigilance state transitions (Wake to NREM, NREM to REM, REM to  
6 Wake and NREM to wake) with corresponding EEG, EEG power spectra, EMG and  
7 calcium fluorescence ( $\Delta F/F$ ) recorded by fiber photometry in a *Gad67-Cre* mice  
8 expressing GCaMP6f. Note that the highest fluorescence ( $\Delta F/F$ ) was observed during  
9 the NREM sleep and the lowest during REM sleep.

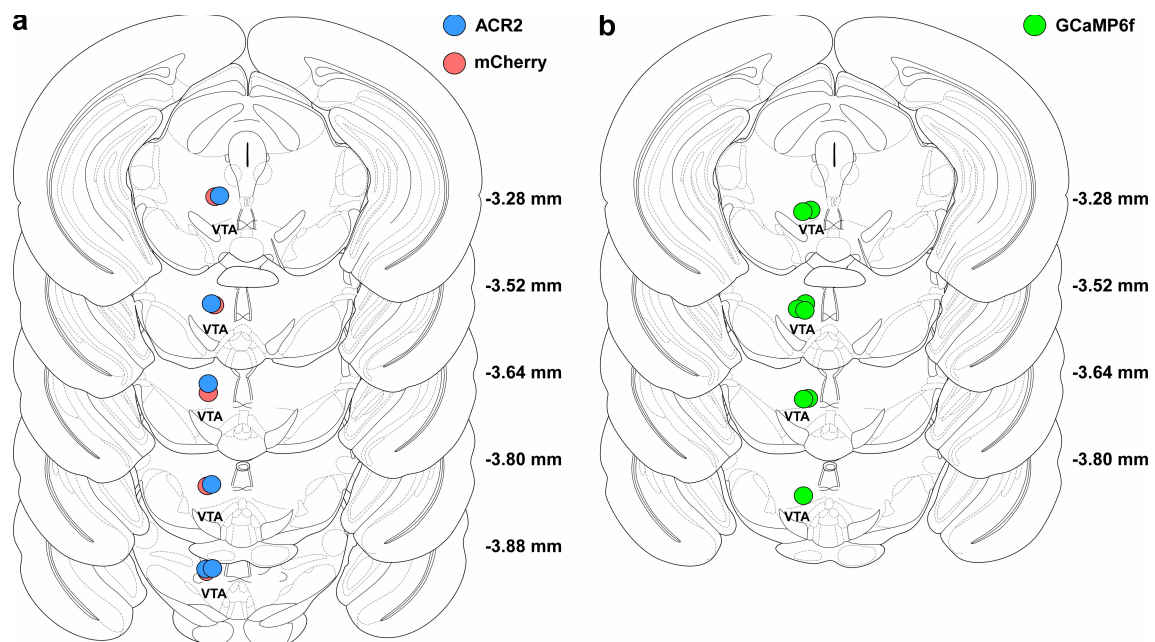

1  
2 **Supplementary Figure 4:** Histological verification of tip of fiber optics in mice used in  
3 behavioral experiments. a) Location of tip of optical fibers in all mice injected with either  
4 ACR2-2a-mCherry (n = 6, blue circles) or mCherry alone (n = 5, red circles). b) Same as  
5 in a, but for GCaMP6f-expressing mice (n = 6, green circles).

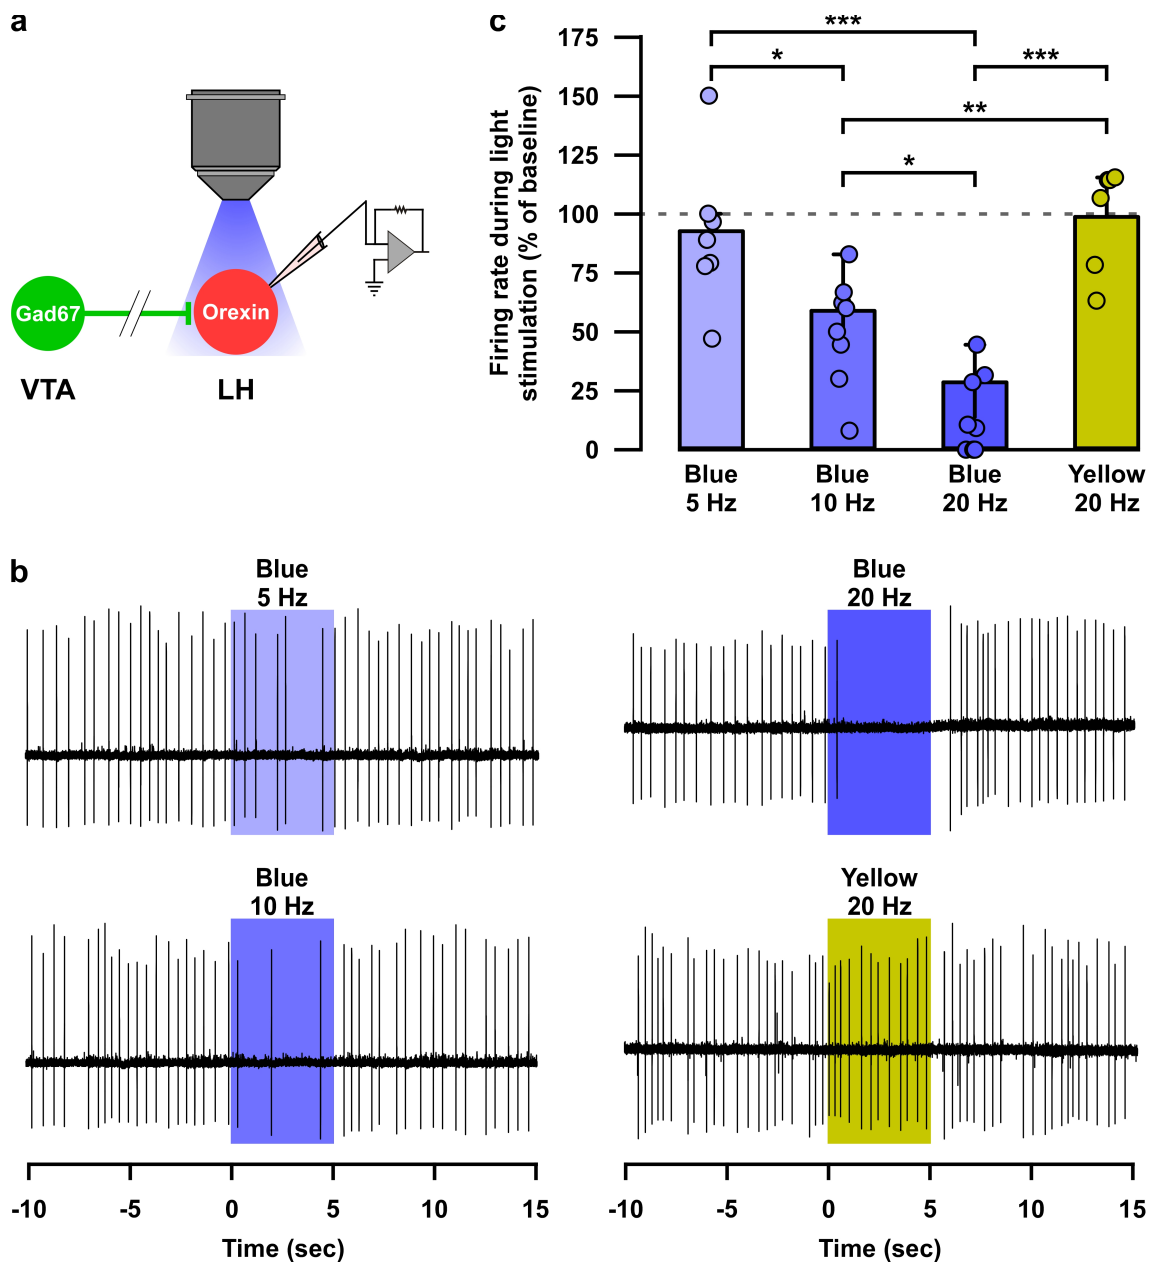

1  
 2 **Supplementary Figure 5:** Optogenetic activation of nerve terminals of  $VTA_{Gad67+}$   
 3 neurons in the LH inhibited orexin neurons in a blue-light pulse frequency-dependent  
 4 manner. a) Schematic of experiment. b) Loose cell-attached recording traces from  
 5  $LH_{orexin}$  neurons while optogenetically activating  $VTA_{Gad67+}$  nerve terminals using light  
 6 pulse of different wavelength and frequency. c) Summary of experiments in (b). Blue  
 7 light 5 Hz ( $n = 7$ ), 10 Hz ( $n = 8$ ), 20 Hz ( $n = 9$ ) and yellow light 20 Hz ( $n = 6$ ).  $p = 0.01$   
 8 (Blue 5 vs 10 Hz),  $p = 3.6e-6$  (Blue 5 vs 20 Hz),  $p = 0.02$  (Blue 10 vs 10 Hz),  $p = 0.9$   
 9 (Blue 5 vs Yellow 20 Hz),  $p = 0.004$  (Blue 10 vs Yellow 20 Hz) and  $p = 1.7e-6$  (Blue 20 vs  
 10 Yellow 20 Hz) one-way ANOVA followed by post hoc Tukey test). Data are represented  
 11 as mean  $\pm$  SEM.
